RESEARCH ARTICLE

# Is functional brain connectivity atypical in autism? A systematic review of EEG and MEG studies

Christian O'Reilly<sup>1,2\*</sup>, John D. Lewis<sup>3</sup>, Mayada Elsabbagh<sup>1,2</sup>

**1** Douglas Mental Health University Institute, 6875 Boulevard Lasalle, Verdun, Canada, **2** Department of Psychiatry, McGill University, 1033 Pine Avenue West, Montreal, QC, Canada, **3** McGill Center for Integrative Neuroscience, Montreal Neurological Institute, McGill University, 3801 University Street, Montréal, QC, Canada

\* Current address: Blue Brain Project, École Polytechnique Fédérale de Lausanne, Campus Biotech, Chemin des Mines 9, Geneva, Switzerland

\* [christian.oreilly@epfl.ch](mailto:christian.oreilly@epfl.ch)

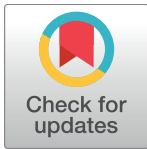

**OPEN ACCESS**

**Citation:** O'Reilly C, Lewis JD, Elsabbagh M (2017) Is functional brain connectivity atypical in autism? A systematic review of EEG and MEG studies. PLoS ONE 12(5): e0175870. <https://doi.org/10.1371/journal.pone.0175870>

**Editor:** Alessandro Gozzi, Istituto Italiano di Tecnologia, ITALY

**Received:** August 31, 2016

**Accepted:** March 31, 2017

**Published:** May 3, 2017

**Copyright:** © 2017 O'Reilly et al. This is an open access article distributed under the terms of the [Creative Commons Attribution License](https://creativecommons.org/licenses/by/4.0/), which permits unrestricted use, distribution, and reproduction in any medium, provided the original author and source are credited.

**Data Availability Statement:** All relevant data are within the paper.

**Funding:** This work is supported by grants from the Fonds de recherche du Québec – Santé (FRQS; <http://www.frqs.gouv.qc.ca/en/>), Bourgeois Foundation, Brain Canada (<http://www.braincanada.ca/>), and the Azrieli Foundation (grant number BC\_Azrieli\_MIRI\_3388; <http://www.azrielifoundation.org/>) attributed to ME. The funders had no role in study design, data collection and analysis, decision to publish, or preparation of the manuscript.

## Abstract

### Background

Although it is well recognized that autism is associated with altered patterns of over- and under-connectivity, specifics are still a matter of debate. Little has been done so far to synthesize available literature using whole-brain electroencephalography (EEG) and magnetoencephalography (MEG) recordings.

### Objectives

1) To systematically review the literature on EEG/MEG functional and effective connectivity in autism spectrum disorder (ASD), 2) to synthesize and critically appraise findings related with the hypothesis that ASD is characterized by long-range underconnectivity and local overconnectivity, and 3) to provide, based on the literature, an analysis of tentative factors that are likely to mediate association between ASD and atypical connectivity (e.g., development, topography, lateralization).

### Methods

Literature reviews were done using PubMed and PsychInfo databases. Abstracts were screened, and only relevant articles were analyzed based on the objectives of this paper. Special attention was paid to the methodological characteristics that could have created variability in outcomes reported between studies.

### Results

Our synthesis provides relatively strong support for long-range underconnectivity in ASD, whereas the status of local connectivity remains unclear. This observation was also mirrored by a similar relationship with lower frequencies being often associated with underconnectivity and higher frequencies being associated with both under- and over-connectivity. Putting

**Competing interests:** The authors have declared that no competing interests exist.

together these observations, we propose that ASD is characterized by a general trend toward an under-expression of lower-band wide-spread integrative processes compensated by more focal, higher-frequency, locally specialized, and segregated processes. Further investigation is, however, needed to corroborate the conclusion and its generalizability across different tasks. Of note, abnormal lateralization in ASD, specifically an elevated left-over-right EEG and MEG functional connectivity ratio, has been also reported consistently across studies.

## Conclusions

The large variability in study samples and methodology makes a systematic quantitative analysis (i.e. meta-analysis) of this body of research impossible. Nevertheless, a general trend supporting the hypothesis of long-range functional underconnectivity can be observed. Further research is necessary to more confidently determine the status of the hypothesis of short-range overconnectivity. Frequency-band specific patterns and their relationships with known symptoms of autism also need to be further clarified.

## Introduction

It is well recognized that autism and autism spectrum disorder (ASD)—hereafter used interchangeably—is associated with altered patterns of connectivity, compared to neurotypical (NT) controls. Increased interest in connectivity reflects a shift from understanding the biological basis of autism as focal brain abnormalities affecting specific systems towards an overall pattern of brain reorganization. Moreover, new evidence on early development of white matter tracks suggests that connectivity could be among the earliest markers of autism, with initial signs emerging within the first year of life [1–3].

Although the autistic brain was initially hypothesized as exhibiting a pattern of overall underconnectivity [4,5] or by long-range underconnectivity and local overconnectivity [6], a more subtle mixture of hypo- and hyper-connectivity is now emphasized [7]. Often, findings remain unreplicated and conclusions divergent regarding the nature of altered connectivity in autism. Several reasons may explain the differences in findings and conclusions including conceptual (e.g., definitions, theoretical models), methodological (e.g., measurement modalities and paradigms, participant characteristics), or analytical (e.g., quality control and processing pipelines).

Previous literature reviews have partially addressed questions about connectivity in autism. These reviews have predominantly focused on structural connectivity using diffusion imaging [8–10] and correlated activity using functional magnetic resonance imaging (fMRI) [10–12]. In contrast, other aspects of connectivity including functional and effective connectivity of electrophysiological activity reported in electroencephalography (EEG) and magnetoencephalography (MEG) have not been the focus of systematic synthesis (however, see [13] for a narrative synthesis of coherence in EEG resting state). Yet, such syntheses are paramount in getting a clear view of the relationship between brain connectivity and autism considering that 1) different recording modalities can provide contrasting points of view on mechanisms altering brain connectivity (e.g., synaptic functions, degree of myelination, inhibitory/excitatory balance, network properties) and 2) their results are not necessarily in good agreement [14]. Because of their high temporal resolution and their direct relationship with neuronal activity

(as opposed to a proxy such as hemodynamic), EEG/MEG connectivity analyses can provide valuable information about dynamic activation and deactivation of functional networks. Further, these can be observed for different oscillatory frequencies depending on the role of each network in integration versus segregation of information, on top-down versus bottom-up propagation of signals, and the tasks or functions they support. Synthesizing evidence about altered functional network connectivity in autism is essential for establishing a coherent theoretical account of the pathophysiology of the condition. Thus, our goal is to fill knowledge gaps by comprehensively reviewing literature on EEG/MEG functional and effective brain connectivity in autism, with a focus on factors influencing over versus under connectivity. We begin with an overview of relevant connectivity concepts and measurement approaches.

## Connectivity: A multi-faceted concept

Brain connectivity is a broad, multi-faceted concept [15]. In human neuroscience, connectivity can refer to physical interconnection of brain regions through bundles of axons (*structural/anatomical connectivity*), to statistical dependencies (e.g., correlation, coherence, consistency in phase-lag) between time series of cerebral activity in different brain regions (*functional connectivity*), or to causal interactions between brain regions (*directed/effective connectivity*) [16]. Structural/anatomical connectivity is generally assessed with deterministic or probabilistic tractography of diffusion weighted images recorded using magnetic resonance imaging (MRI) scanners. The two other types (i.e., functional and effective) are assessed mainly using electromagnetic (e.g., electroencephalography (EEG), magnetoencephalography (MEG), local field potentials (LFP), spike trains), hemodynamic (e.g., functional MRI (fMRI) or near infra-red spectroscopy (NIRS)) and, to some extent, nuclear recordings (e.g., positron emission tomography (PET), single-photon emission computed tomography (SPECT)).

Although the term *connectivity* is often used interchangeably in the literature to denote any or all of these variants, different measures can show surprisingly little agreement [14,17]. Aside from measurement issues and biases, a few reasons may explain the discrepancy among measures. One of these reasons is the complexity of the relationship between structural and functional connectivity. For example, neural networks have an intricate structure of excitatory and inhibitory neurons forming local microcircuits (i.e., “a minimal number of interacting neurons that can collectively produce a functional output” [18]), which synaptic connectivity can either amplify or attenuate measures of functional connectivity. How this micro-connectivity impacts on macroscopic structural and functional connectivity is unclear. Functional connectivity can also be modulated by factors independent from structural connectivity (e.g., synaptic depression, properties of sensory afferent signals) and can appear through indirect paths, not structurally connected by a direct track but functionally coordinated by an intermediate structure (e.g., cortico-thalamo-cortical pathways) not considered by direct structural connectivity.

Similarly, different modalities of functional connectivity show complex interdependencies. For example, the relationship between electrical and hemodynamic activity has been shown to depend on frequency and spatial scale, with particular EEG rhythms generating region-dependent variations in blood oxygen levels and glucose metabolism [19,20]. Cross-frequency dependencies can even be observed between recording modalities. For example, slow hemodynamic rhythms are known to be correlated with the amplitude of fast gamma-band EEG/MEG activity [21,22].

Furthermore, it is worth remembering that functional connectivity is generally based on similarity of signals observed between pair of regions and, in most cases, no control of the potential contribution of a third source is made. This situation may be improved by multivariate approaches [23], but it seems unlikely to be completely controlled, particularly for cortical

activity initiated by subcortical structures (e.g., thalamo-cortical pathways) since such third sources are generally hidden (i.e., not measured) and are therefore difficult to estimate and mitigate [24]. The situation is much different when assessing structural connectivity by measuring the area of a fiber bundle section linking two regions. In the latter case, there is no potential hidden third source confound. Therefore, different forms of connectivity need to be treated as different, yet related, constructs. Integrating knowledge from EEG/MEG with other functional (e.g., fMRI, PET) or structural (e.g., tractography) modalities is expected to be a fruitful avenue because of possible complementarity between modalities, but it must be performed very cautiously in view of many potential pitfalls.

## Connectivity hypotheses in ASD

The large amount of literature on connectivity in autism yields multiple distinct hypotheses about the nature of over- and/or under-connectivity. We considered three classes of inter-related hypotheses regarding connection length, topological specificity, and developmental effects.

**Over- and under-connectivity in relation with connection length.** A popular hypothesis considers autism to be characterized by long-range underconnectivity potentially combined with local overconnectivity [6,25–27]. This hypothesis is predominantly supported by structural and functional MRI and post-mortem immunocytochemistry investigations. For the structural part, this pattern can be explained by ASD-related abnormalities at the cellular level:

- long-range structural underconnectivity can result from a degradation of fiber bundles [1,28–40], with many studies reporting decreased fractional anisotropy and/or higher mean diffusivity in ASD for the superior longitudinal fasciculus, occipitofrontal fasciculus, uncinate fasciculus, inferior longitudinal fasciculus, cingulum, and corpus callosum [41];
- local structural overconnectivity can result from a decrease of apoptosis, axonal pruning, and dendritic degradation, and from an increase of neurogenesis [42].

However, local connectivity may often be obfuscated by long-distance connections (e.g., in presence of long-range crossing fibers in diffusion imaging). In such cases, long-range underconnectivity makes local connectivity more clearly observable without meaning that there is a true increase in local connectivity (i.e., there is an augmentation of the relative number of local connections because of a loss of long-distance connections, but there is no augmentation in their absolute number).

For the functional part, many fMRI studies reported long-range underconnectivity in ASD, whereas local overconnectivity has been reported less consistently [26,43,44]. In a recent review of the literature, 26 out of 33 fMRI studies were shown to report reduction or loss of—sometime local but most often long-range—connectivity in ASD [41]. The prefrontal cortex and the posterior cingulate cortex were most often shown to exhibit long-range underconnectivity. Other regions (e.g., precuneus, anterior cingulate cortex, superior temporal gyrus, posterior superior temporal sulcus, anterior insula, parietal lobule) showed primarily long-range underconnectivity, but were also associated in some studies with long-range overconnectivity.

Various experimental observations have been proposed as potential correlates or causes for local functional overconnectivity, such as smaller but more numerous cortical neurons and mini-columns, which might indicate a bias toward local processing [45]. It may also be caused by a higher excitatory/inhibitory ratio favoring local interactions [46,47], for example through a deficient GABAergic signaling [48]. Appropriate GABAergic activity is also important for normal operation of local circuitry such as appropriate functional segregation of mini-column through lateral inhibition provided by GABAergic basket cells [49]. It is also involved in

generation of gamma-band activity through parvalbumin-expressing fast-spiking interneurons [50]. Activity in the gamma-band is associated mostly with local computation [51,52], it is involved in many processes (e.g., perceptual binding and selective attention [53]) showing alteration in ASD, and abnormalities in this frequency band have been reported consistently enough to be proposed as being a marker of ASD [54].

Finally, related to the hypothesis concerning long-range versus short-range connectivity, the operational definition in the reviewed literature remains elusive. This is particularly problematic in EEG/MEG, since these modalities do not have a good spatial accuracy and comparison of nearby pairs of sensors (i.e., local connections) is confounded with volume conduction (see the [discussion](#) for more on this topic). One possible definition—and the one we use in this review—for EEG/MEG long-range connectivity is that it reflects inter-lobar or inter-hemispheric connections. However, we also interpret evidence showing a graded response of connectivity with respect to distance, for example, when the connectivity is correlated with the inter-sensor distance.

**Topological specificity.** Evidence for altered connectivity in various brain regions comes from investigations of brain structure (MRI, diffusion imaging, post-mortem immunocytochemistry, etc.). ASD-related abnormalities have been documented in the frontal lobe [25,55,56], including abnormal organization of neurons and microglial cells [57]. Evidence from fMRI supports a pattern of underconnectivity from frontal to other brain regions [58]; i.e., lower frontal to parietal connectivity [59] and reduced antero-posterior connectivity [58,60]. However, these studies were conducted in adults and may therefore be characterizing a cascade effect that appears over development. For example, underconnectivity in 24-month-olds with ASD have been shown to be predominantly in occipital regions, with important abnormalities in temporal lobes, but almost no abnormalities in frontal areas [61].

Abnormal connectivity between the occipital lobe and the other regions is also often reported; an observation that might be related with structural and functional abnormalities in processing of visual input in ASD [62–66]. In a large database of resting-state fMRI recordings, underconnectivity was also found in all lobes, but particularly for the temporal, whereas overconnectivity was mainly affecting connectivity with subcortical structures, particularly for connections linking the thalamus and the globus pallidus to the primary parietal sensorimotor regions [67].

Contrary to hypotheses about deficiency in specific regions, an alternative hypothesis suggests an overall non-topographically-specific alteration of brain connectivity in ASD. Support for this hypothesis is based on evidence of a more randomly connected brain in ASD [68], which results in a cross-interaction between the degree of connectivity of brain regions and the diagnosis of ASD; i.e., ASD shows an increase (respectively, a decrease) in connectivity for pairs of regions which display low (respectively, high) connectivity in controls [69].

**Developmental hypotheses.** The typical developmental course of connectivity remains poorly understood but its determinants (e.g., pruning, myelination) and its indexes (e.g., fractional anisotropy, magnetization transfer ratio) appear to follow an inverted U-shape trajectory during maturation, which progress from posterior to anterior regions and from primary to association cortical areas. These maturational patterns appear to differ in autism from very early in development [1,2]. Diffusion imaging shows early elevated fractional anisotropy (1.8–3.3 year-old range in [70]; 1.5–5.8 year-old range in [71]; elevated at 6 month-old followed by reduction to below controls at 24 month-old in [1]) followed by a reduction below neurotypical values later in life (7–33 year-old in [28];  $14.6 \pm 3.4$  year-old in [72]). This observation suggests a possible age-related inversion of trends in measured connectivity (i.e., from initial overconnectivity to later underconnectivity) potentially due to slight differences in developmental trajectories. Interesting relationships might be hypothesized linking this potential

initial overconnectivity with the early overgrowth of the brain in ASD [55,73] and the early maturation of white matter tracts previously reported in toddlers and young children with ASD [1,70,71,74]. Because early stages of typical development involve initial structural overconnectivity followed by a pruning of connections in the maturing brain [75], differences in maturation rates can be expected to modulate the degree of connectivity. For example, a delay in the onset of axonal remodeling could drive brain overgrowth, yielding an abnormally large brain and therefore abnormal long-distance connections. Such connections are more likely to be pruned given that this process is driven by competition for neurotrophins [76], and the increased conduction delays and cellular costs associated with longer fibers puts them at a disadvantage in this competition. Thus, a delay in the onset of axonal remodeling could drive brain overgrowth and thereby favor short-distance connections over long-distance connections via typical developmental mechanisms [77,78].

Differences in developmental trajectories of brain connectivity observed with EEG/MEG might also be exacerbated if excitatory and inhibitory neurons mature at different speeds (e.g., a slower rate of reduction of intra-cellular chloride ionic concentration during development would result in delayed transition of GABAergic neurons from excitatory to inhibitory [48]). Such an altered development would shift the normal evolution of the excitatory/inhibitory ratio (already known to be abnormal in ASD [47]). In turn, it is likely that this imbalance would influence the degree of functional connectivity in cortical pyramidal neurons, the cell population generally considered as the main source for observable EEG/MEG activity. Similarly, differences in maturation of feedforward versus feedback pathways might be responsible for some transient developmental aberration in overall connectivity. Since feedback connections develop later than feedforward [79] and ASD is a developmental disorder, feedback projections could be preferentially altered.

Regarding which brain region might show the largest developmental differences, fMRI studies have reported the default mode network as being particularly vulnerable to ASD [80,81]. The associated brain regions would show a slower maturation than in neurotypical controls. Among the structures involved in this network, the impact of slower maturation is likely to be more prominent for the frontal lobe since it is one of the last structures to mature in the brain, a process that continues up to the mid-twenties [82].

## Scope of the review

Taken together, these different hypotheses demonstrate the complexity of the impact of ASD on connectivity, which is most probably characterized by both generalized atypicality (e.g., long-range underconnectivity, increased randomness in connection patterns) and more localized abnormalities (i.e., specific deficits in some nuclei or brain regions) that develops during the first years of life.

Although the current body of evidence related to connectivity comes mostly from fMRI [10–12] or from structural approaches using diffusion imaging [8–10], there has been an increase in complementary methods. Specifically, EEG/MEG functional and effective connectivity can reveal qualitatively different results which are important to our understanding of how the brain wiring is altered in autism. Evidence synthesis on that topic is currently missing. Therefore, in this paper, we comprehensively review the literature on EEG/MEG functional and effective brain connectivity in autism, against the different hypotheses described above, particularly focusing on factors influencing overconnectivity versus underconnectivity. Although it is currently unclear if local connectivity in EEG/MEG should be assessed by comparing the activity between pairs/groups of sensors or alternatively using single point measurements across a whole group of sensors (e.g., through spectral power), this review is limited to



studies measuring connectivity using the former approach. Complementary review of other novel methods to characterize brain activity in ASD such as quantitative EEG can be consulted elsewhere (e.g., see [83,84]).

## Methods

Our review focuses on original research assessing functional and effective connectivity as measured by EEG or MEG. Searches on PubMed and PsychInfo executed on March 6<sup>th</sup> 2016 using the research string “(EEG OR MEG OR electroencephalo\* OR magnetoencephalo\*) AND connectivity AND autism\*” returned 102 and 67 hits respectively. Only journal and conference papers published in English were reviewed.

Studies were retained if they presented original experimental findings on participants with an ASD phenotype, including individuals diagnosed at any age as well as studies comparing low versus high-risk infants defined by the presence or absence of an older sibling diagnosed with ASD. One study correlating ASD traits in a neurotypical population with differences in connectivity features was also included.

We excluded articles discussing functional or effective brain connectivity without reporting new experimental results on this topic. We also excluded articles reviewing neurofeedback approaches using connectivity measurements, methodological articles proposing new approaches for assessing brain connectivity, and studies inferring on connectivity only through indirect measurements, e.g., EEG/MEG complexity, ERP timing, spectral power, or local inter-trial synchronization.

Appraisal of methodological quality of included studies was conducted by one of the authors (COR). This led to exclusion of one study due to probable methodological issues related to multiple comparisons, confounders, and mismatching statistics [85], and of a second study because of a too small sample (i.e., two subjects per group [86]). A third study [87] was retained but interpreted with caution because of inappropriate control of multiple statistical comparisons. In that study, the authors addressed the problem of multiple comparisons by computing, for each node of their graphs, an average t-value from 48 leave-one-subject-out t-tests. However, if standard statistical hypotheses are valid (normality, absence of outliers, etc.), this “bootstrapped” evaluation of the mean t-value will converge toward the t-value for the whole sample (i.e., the uncorrected t-value). However, t-tests are still being computed at every node resulting in N independent statistical tests with an alpha-threshold at 0.05, which will provide up to 5% of false positives under the null hypothesis. The “leave-one-out” approach does nothing to correct for these multiple comparisons.

A total of 52 papers were retained, 31 using EEG [88–118] and 21 using MEG [87,119–138]. The selection process is depicted in Fig 1. For each study, one of the authors (COR) extracted methodological dimensions that potentially impacted results and conclusions, such as:

- connectivity metrics;
- recording parameters (sampling frequency, reference electrode, electrode grid density);
- experimental paradigms (e.g., resting-state, event-related experiments, sleep studies);
- sample characteristics (age, gender, IQ, diagnostic confirmation method, sample size).

The wide variability in study characteristics along these methodological dimensions precluded a meta-analysis to address the main objectives of the review. Instead, we synthesized and critically appraised findings of the over-arching hypothesis that ASD is characterized by

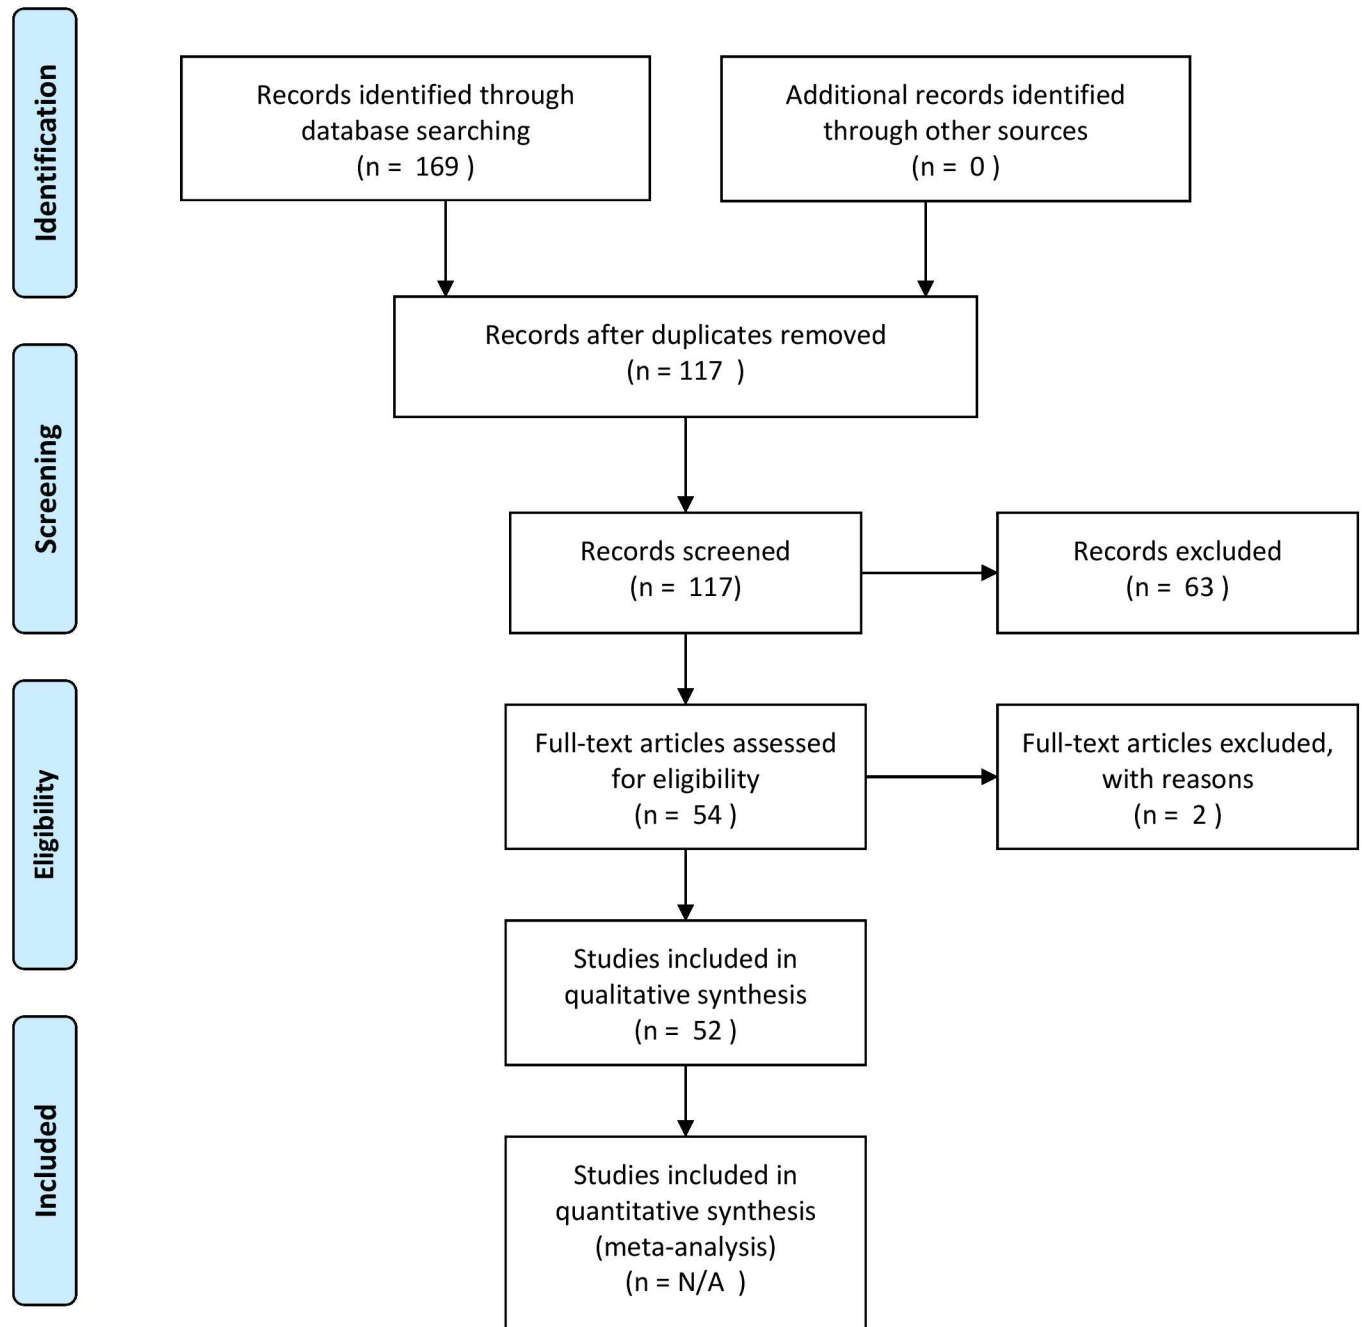

From: Moher D, Liberati A, Tetzlaff J, Altman DG, The PRISMA Group (2009). Preferred Reporting Items for Systematic Reviews and Meta-Analyses: The PRISMA Statement. PLoS Med 6(7): e1000097. doi:10.1371/journal.pmed1000097

**Fig 1. PRISMA (Preferred Reporting Items for Systematic Reviews and Meta-Analyses) flowchart describing the paper selection process.**

<https://doi.org/10.1371/journal.pone.0175870.g001>

long-range underconnectivity and local overconnectivity (as a valid generalization of a more complex phenomenon), and systematically reported results related to factors that can impact this hypothesis (exceptions to the generalization; development, topography, lateralization).



## Results

### Synthesis per methodological dimensions

We first synthesized included studies across several methodological dimensions that may account for some inconsistencies in including connectivity metrics, recording parameters, experimental paradigm, and sample characteristics. Outcome of this analysis can be found as supplementary documents [S2 File](#) along with tables (see [S1](#) and [S2](#) Tables) summarizing the information extracted for included studies (split by EEG vs. MEG).

### ASD is characterized by long-range underconnectivity; Local overconnectivity remains uncertain

As reviewed in the introduction, a prominent hypothesis is that autism is characterized by local overconnectivity and long-range underconnectivity [25,26]. EEG/MEG studies provide partial support for this hypothesis with some studies showing both phenomena in ASD population [90,114]. This distribution of under/overconnectivity is also correlated with the presence of autistic traits in the neurotypical population [89].

Overall, the case for long-range underconnectivity is well supported. This is particularly clear for the case of inter-hemispheric connections, for which a decrease in EEG/MEG functional connectivity has been reported in many studies [93,94,96,100,107,114,134]. A smaller number of studies report mixed long-range overconnectivity and underconnectivity [97] or increased long-range connectivity in infants [113] and adolescents [116,117], in adult rapid-eye movement (REM) sleep [108], and during a picture-naming task in adults [120]. Also, some indication for long-range overconnectivity has been found during slow wave sleep [92], although the effect was marginal ( $p$ -values = [0.1, 0.05]) when corrected for multiple comparisons. In sum, while ASD is characterized by a general long-range underconnectivity, it is likely that this pattern is modulated by task requirements or developmental processes.

Local overconnectivity in ASD is less robustly established. A few studies report local overconnectivity [89,90,114,117,139], while others found local underconnectivity in ASD [96,97,125,130,140] or a mix of both patterns [112]. Similarly, indirect support for local overconnectivity is provided by reports of an enhanced local synchronization [141], which can be associated with higher local functional connectivity (i.e., functional connectivity is correlational in nature and assesses how the activity between two regions is similar, which often means synchronized). There are, however, many theoretical and practical issues related to the definition and the reliable measurement of local connectivity in EEG/MEG (see the [Discussion](#) section) which make it difficult to reach definitive conclusions.

The hypothesized pattern of long-range underconnectivity and short-range overconnectivity is paralleled by the general trends observed as a function of frequency (see [Fig 2](#)). Overall, evidence suggests underconnectivity in ASD at lower frequencies (delta to beta bands) with potential overconnectivity in higher bands. This tendency is particularly well illustrated in resting-state by the work of Ye and collaborators [138]. These general trends seem rather robust despite the substantial methodological variability across studies, e.g., paradigms, samples, and connectivity measures ([S1](#) and [S2](#) Tables). This pattern of results is different from reported EEG power abnormalities in autism, which show a U-shape curve with increased low-frequency (delta, theta) and high-frequency (beta, gamma) activity and reduced middle-ranged frequencies (alpha) in ASD [13].

General underconnectivity in lower frequency bands has been observed as a function of the number of autistic traits in a neurotypical sample [89] as well as for all age groups of ASD participants (e.g., in infants and young children [91], in adolescents [93], and in adults [94]) and

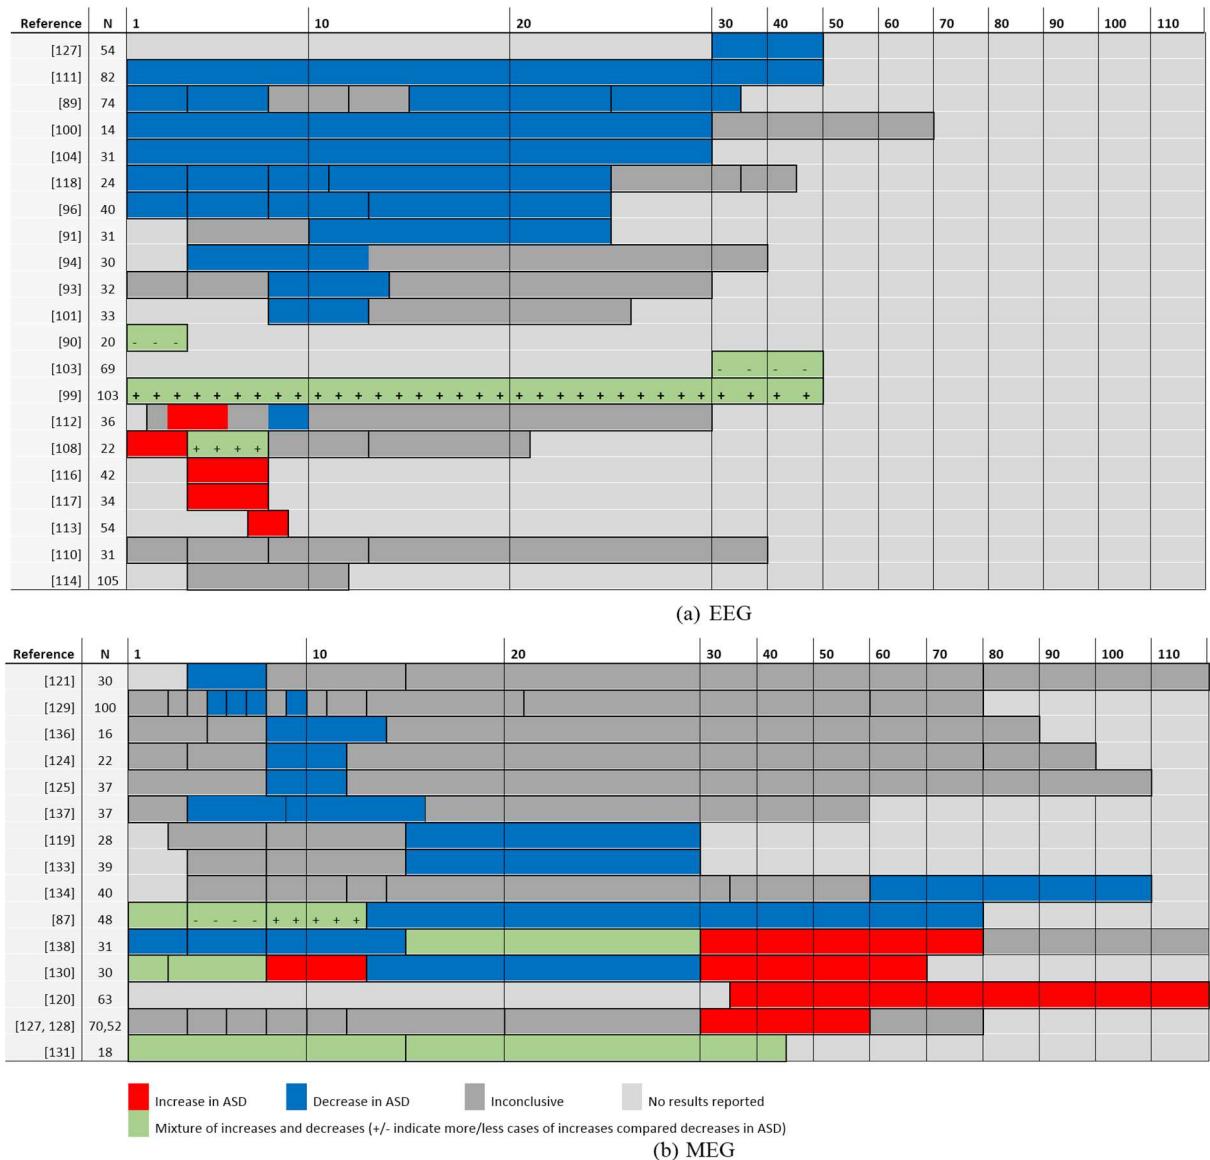

**Fig 2. Summary of band-specific increases versus decreases in EEG/MEG functional connectivity in ASD (compared to NT controls).** The “N” column list the total size of the sample (i.e., sum of participants in all groups). Frequency is varying along the x-axis, from 1 Hz to 120 Hz.

<https://doi.org/10.1371/journal.pone.0175870.g002>

for a wide range of paradigms (e.g., resting-state [96], event-related [100], and sleep [105]), suggesting that it is associated with neurodevelopmental abnormalities that are not limited to a specific brain region or state [93]. Evidence of overconnectivity in high-frequency bands is more scarce but accumulating, particularly in MEG studies (see Fig 2).

Tentative relationships can be proposed between frequency bands, the scale of connectivity, and the degree of connectivity. The modulation of over vs. under connectivity depending on the frequency band is consistent with slower oscillators involving more neurons in larger volumes [52]. Such a relationship is to be expected from “wiring economy”. Indeed, the coordination of higher frequency activity across regions requires faster communication. Therefore, for any given distance between two regions, larger (and costlier) axons are required to coordinate faster frequencies. In this context, it is more efficient to bias connectivity such that high-frequency band

activity is shared locally, whereas slower frequency bands are used for long-range interaction. Thus, we expect high-frequencies to be *preferentially* associated with more localized processes and activity in lower bands to be *preferentially* associated with more wide-spread integrative processes. Indeed, integrative top-down processes (i.e., processes integrating *a priori* knowledge about the world with incoming signals from the senses to generate a percept) involving long-range connections are *often* associated with slower rhythms (delta, theta, alpha), whereas synchronization of local cortical networks through bottom-up processes (i.e., processes modifying the internal representation of the world to minimize its mismatch with information from the senses) *tends* to be associated with faster frequencies (beta, gamma) [142,143]. Such a generalization, however, will need further investigation in view of several exceptions (e.g., the existence of large-axon long-range fast-spiking interneurons synchronizing high-frequency rhythms between distant regions [144]). Further, both reports of MEG underconnectivity in high-frequency bands are associated with long-range connections [87,134], with one of these studies explicitly limiting its investigation to long-range inter-hemispheric connections [134].

### An alternative hypothesis from graph theory: A more uniform altered connectivity in ASD

EEG and MEG connectivity studies using graph analysis generally report autism to be associated with sub-optimal network properties, such as less clustering, larger characteristic path, reduced eigenvector centrality (a measure of the importance of nodes as communication hubs), and an architecture less typical of small-world networks [89–91,114,133,135,136]. Small-world networks are thought to be striking an optimal balance between integration and segregation, making them particularly efficient. This topography is present in a wide range of contexts, such as in social networks or flight networks, but also in neural networks [145]. It is characterized by each node having a relatively small number of neighbours but being able to reach any other node by only a small number of steps (i.e., although they tend to form small cliques, each node is separated from every other node by only a few levels of separation, thanks to a relatively small number of “hub” nodes providing between-clique connectivity).

Neural networks in ASD have been shown to be more resilient because of their greater homogeneity and their more uniform architecture [114]. This, in turn, results in a less optimal balance between local specialization (segregation) and global integration [145]. Findings from network analysis seems consistent with the hypothesis of a more randomly connected brain. It has been supported as supported by EEG/MEG studies showing smaller patches (more localized, less blended) of increased MEG signal complexity in controls compared to ASD [122], a much more disorganized pattern of connectivity in ASD [119], and more redundant networks in ASD (i.e., more randomness in a network increases redundancy and resilience but decreases efficiency and specialization) [114].

However, these analyses have been performed on graph topologies, which preserve very little relationship with spatial properties of brain activity. Specifically, edges of these graphs are not weighted by the length of the connections and the angles between the edges are unspecified. Therefore, the spatial arrangement of the nodes is lost and the results cannot be reconciled with the findings reviewed above on the impact of connection length on over/underconnectivity.

### Factors modulating connectivity patterns

Although the hypothesized pattern of over and under connectivity in autism is a valuable conceptual generalization, many factors may modulate connectivity at a finer scale reflecting context-dependent modulations in connectivity. Below we consider the factors that were prominent in the reviewed of the literature.

**Lateralization.** Many cognitive processes display brain lateralization, language being a classical example. Since symptoms associated with autism are associated with lateralized cognitive functions (e.g., executive functions and language), many studies have looked for and found atypicalities in lateralization of brain functions in autism [146]. In the reviewed literature, many studies reported function- or structure-dependent EEG/MEG connectivity abnormalities related to ASD. The most evident are reports of abnormal lateralization of functional connectivity, with an elevated left-over-right EEG and MEG functional connectivity ratio in ASD.

For example, studying gamma-band connectivity in relation with face processing, a leftward (instead of the normal rightward) lateralization emerging around one year of life was found [103]. The authors hypothesized that this abnormal lateralization might be related with potential differences in face recognition in autism [147,148] because it suggests a more featural-based (processing and recognition of local features in a visual scene; typical of left hemisphere) than configural-based (integration of all the parts of a stimulus in a coherent percept; typical of right hemisphere) face recognition processes [149]. Also, in one-year-old infants at high-risk for autism (HRA) that have later been diagnosed with ASD, an increase in the alpha-band connectivity predominant in the left fronto-centro-parietal region during video watching was found in one study [113], although a second study did not report any hemispheric differences between HRA infants and low-risk controls [115].

Similarly, an elevated long-range fronto-posterior functional connectivity in children with ASD was observed prominently in the left-hemisphere [116]. Such increased left-hemisphere coherence has also been observed in low-functioning ASD children when compared with high-functioning ASD children [117].

A rightward reduction of beta-band connectivity (phase lag index) between the occipital lobe and frontal, temporal, and parietal areas in a numerosity task (i.e., participants had to estimate the number of dots either distributed to form an animal shape or randomly positioned) was also reported in ASD [119]. The authors suggested impairment in the capacity of using a global interpretation style (Gestalt perception; right hemisphere) in ASD and potentially a shape recognition strategy relying too heavily on a local processing of visual information (left hemisphere) [150]. This hypothesis seems to be coherent with the observed decrease in long-range connectivity in ASD given that such connectivity is thought to be important for global integration of widespread brain activity. Also consistent with an elevated left-over-right functional connectivity ratio in ASD is the report of increased connectivity (Granger causality) 1) from the left inferior frontal gyrus to the left fusiform area in high-beta and low-gamma frequencies and 2) from the left superior temporal gyrus to the left occipital lobe in the beta and gamma bands during a picture naming task [120]. Another study showed reduced right hemisphere temporal-central alpha-band coherence in ASD adolescents compared to neurotypical controls [101].

In an event-related paradigm in which emotional stimuli evoke bilateral activation of the insula in neurotypical adults [151], a less bilateral pattern (i.e., more lateralized) was found in ASD with significantly lower connectivity (phase lag index) of the right (but not the left) insula with areas including the right fusiform, right inferior temporal gyrus, and superior frontal regions in ASD [133].

Using photic stimulation, a leftward predominance in connectivity increased at stimulated frequencies has been observed in ASD, with a larger group difference at higher frequencies [106,107]. Although these studies did not report such asymmetry in their resting-state recordings, Coben et al. [96] found an increase in relative theta power but a reduced absolute beta power over the right hemisphere for the autistic group during resting-state. These authors argue that such an excess in theta power might be related to abnormal brain functioning in

ASD, based on similar observations made in children with attention deficit/hyperactivity disorder [152], learning disabilities [153], and mental retardation [154]. Leftward asymmetry and altered EEG power lateralization was also reported [155]. Still in resting-state, Murias et al. [112] reported theta-band overconnectivity in ASD within left hemisphere frontal and temporal cortex, whereas Barttfeld et al. [90] observed an increase in delta-band local connectivity in lateral frontal electrodes, which was particularly salient in left hemisphere.

During the REM phase of sleep, more important increases in coherence were also noted in the left hemisphere, particularly for the delta band [108]. Kikuchi et al. [127] reported the more contradictory results with an increased rightward connectivity lateralization in gamma band in a sample of 3–7 years old infants with ASD, but not on a 5–7 years old sample [128] during passive video watching. Although they found no between-group differences in laterality in that latter sample, within the ASD sample, they showed that more rightward laterality in connectivity was correlated with better performances in reading and in pattern reasoning. This associate a leftward lateralization with more severe symptoms, as shown in the other studies, and is consistent with the idea that such spatial skills typically relies more on the right hemisphere [156].

In sum, a consistent pattern of increased left-over-right EEG and MEG connectivity ratio has been observed in ASD. This pattern may well reflect specific perceptual characteristics of this population in which local components are more strongly processed (segregation) relative to global relationships between components (integration; Gestalt style). This altered processing style can be hypothesized to be a consequence of the observed drop in long-range connectivity. A lack of proper long-range connectivity may not provide an adequate substrate for the normal development of the rightward more global and integrative style of processing. Compensatory development of more leftward local-processing style may, however, still be possible if shorter-distance connectivity is not as severely affected by the disease. It is also relevant to note that an enhanced EEG power has been consistently reported in the left hemisphere across all frequencies (reviewed in [13]) which may be a confounding factors in studies not controlling for potential impact of an increase in power on the resulting increase in connectivity (e.g., as can be seen in the case of coherence computed using a common reference [157]).

**Topography of connectivity differences in ASD.** Cognitive processes that are known to be atypical in ASD are, to some extent, localized to specific brain regions. Thus, there is an interest in investigating the topography of connectivity abnormalities to further associate altered patterns of connectivity with observable phenotypes and symptoms. Among the reviewed studies, some discussed general topological differences at sensor-level, whereas others used more precise analyses of cortical sources to localize abnormalities. For example, in MEG, a reduced coherence between the frontal eye field (a region involved in voluntary eye movements) and dorsal anterior cingulate cortex in an ASD population in a saccade/anti-saccade task has been shown [124]. Abnormal underconnectivity of the fusiform face area with various other structures (left precuneus, right inferior temporal gyrus, and superior frontal regions) in tasks involving face stimuli has also been reported using cross-frequency coupling [125] and phase lag index [133].

These results are examples showing that more subtle patterns of connectivity are most certainly region- and function-dependent. Consistent with the topological hypotheses reviewed in the introduction, a large number of studies included in S1 and S2 Tables report involvement of frontal [90,93,108,112,113,121,137,138,141] or occipital regions [90,96,100,108,112,121,122,138,158], although reports of significant differences in connectivity can be found between virtually all pairs of brain regions. The variability in experimental paradigms, analyses, and sample characteristics prevents establishing clearer generalizations of these findings. It is worth noting though that frontal and occipital regions have the longest

inter-hemispheric connections, which may account for the prevalence of observed underconnectivity in these regions if long-range connections are preferentially affected by ASD. Also, studies in infants are under-represented in this literature, which may cause abnormalities emerging at this age to be under-represented. Further, some regions of the brain may also be poorly covered by small-grid EEG studies, such as inferior regions of temporal lobes.

**Development.** Differences in EEG/MEG functional connectivity are emergent rather than static over development [103,115]. However, a consistent portrait of how these connectivity differences emerge is yet to be established. Righi et al. [115] reported a decrease of connectivity (coherence) in the gamma band for HRA infants, a trend that was more pronounced for the portion of HRA infants which later developed ASD, whereas Orekhova et al. [113] reported increased alpha-band connectivity (debiased weighted phase lag index) in HRA infants who later developed ASD. Relying on reported correlation between EEG alpha-band coherence and structural integrity of white matter [159], these authors relate this alpha-band hyper-connectivity in toddlers with the frequently reported alpha-band hypo-connectivity in adolescence/adulthood by highlighting the abnormal trajectory of white matter maturation in ASD: early maturation of white matter tracks in toddlers and young children [1,70,71,74] followed by slowing of white matter increase in toddlerhood [1] and later childhood [160,161] ending in predominant hypo-connectivity in adulthood [26]. Thus, patterns of connectivity differences between ASD and NT participants should not be thought of as being static over time. Although more corroboration is still needed, it might well be captured by a general early hyper-connectivity followed by a regression toward hypo-connectivity later in development.

Developmental change continues to impact connectivity patterns later in development. Using resting-state MEG recordings from 6–21 years old individuals, Kitzbichler et al. [130] found in their NT control group an initially strong beta, theta, and delta-band connectivity involving frontal regions. This connectivity decreases later with maturation, presumably evolving toward more specific interconnections. This developmental change was not observed in ASD participants who initially started with a low frontal connectivity and stayed at this level.

## Discussion

### Summary of the main observations reported in the reviewed literature

Our systematic review of a large body of evidence suggests that ASD is characterized by a pattern of EEG/MEG functional connectivity that is in general more randomly organized, with abnormal connectivity often involving frontal or occipital regions—at least in adult samples—although abnormal connectivity patterns have been reported in almost every region. Abnormal lateralization of activity in resting-state and in specific tasks seems to be typical, with a very systematic report of elevated left-over-right EEG and MEG functional connectivity ratio in ASD. Both abnormal intra- and inter-hemispheric connectivity can be observed with a general trend toward underconnectivity, but with probable local or condition-specific (task, spectral band, brain region) overconnectivity. Underconnectivity can most reliably be observed in lower frequency bands (hypothesized to be preferentially involved in long-range integrative networks) whereas a stronger tendency for overconnectivity can be observed (see Fig 2) in high-frequency ranges (hypothesized to be generally associated with more localized processes). These findings appear to hold despite substantial variability across several methodological dimensions including recording characteristics and analytic approaches. More investigation on the relationship between over/underconnectivity and EEG/MEG frequencies is nevertheless needed to corroborate these conclusions. This study might further benefit from looking at potential modulation across regions of high-frequency activity by the phase of slower rhythms (i.e., between-region phase-amplitude coupling) [162], how these different frequencies relate



to feed-forward and feed-back processes at play in information integration, and how these different observations may or may not be integrated in a theory-driven accounts, such as the predictive-coding framework [163–172].

## Heterogeneity in ASD

Despite these general patterns related to categorical diagnosis of ASD, several findings highlight the importance of considering variability in the ASD phenotype related to connectivity. For example, individuals with an Asperger's diagnosis can be differentiated from those with other ASDs relatively accurately (92.3% in [98]) based on their patterns of connectivity. Although the authors did not provide detailed information on how groups compared with respect to ADOS scores, they used a large sample of ASD children ( $N = 430$ ), which is likely to overlap with the Asperger's sample ( $N = 26$ ) regarding the severity of the condition. Similarly, ASD with Fragile X Syndrome or with a *de novo* chromosomal mutation causing agenesis of corpus callosum is another example of a subgroup of individuals with ASD that might be clearly defined from a clinical point of view. These persons reported a normal level of attention to details, with the preserved ability to appreciate the whole rather than a preoccupation with patterns or parts [132]. Thus, connectivity features shown to correlate with greater attention to details in ASD (e.g., eye-open resting-state alpha power and coherence in posterior regions [110]) are probably under-represented in this subgroup. Thus, it might become increasingly important to subgroup or control for the different conditions that are grouped under the ASD umbrella to better understand the impact of this heterogeneity on observed connectivity patterns and, hopefully, to reconcile some contradictions in the literature.

Further, abnormalities in EEG/MEG functional connectivity increase with increasing symptoms severity in autism. Measures of connectivity abnormalities reported in surveyed papers has been correlated with the presence of autistic traits in the NT population [89] and with the severity of autism symptoms in ASD samples: ADOS scores were shown to correlate with connectivity strength in gamma and beta bands [130], with theta-band coherence in left-anterior and right-posterior regions [129], with phase-amplitude coupling in the fusiform face area (for face-processing task) [125], and local functional connectivity based on phase-locking [126]; SRS scores correlated with regional average complexity and connectivity node strength [87]; visual reasoning and reading abilities correlated with lateralization of coherence in the parieto-temporal regions in gamma band; imagination measure on the parent-report adult AQ correlated with global connectivity in the right superior temporal gyrus [132].

## Limitations

The conclusions derived from our systematic review are limited by a few potential methodological confounders. These are discussed hereafter.

**Interpretation of EEG/MEG functional connectivity.** The hypothesis underlying every approach used to measure functional connectivity in EEG/MEG is that the estimated connectivity (i.e., the similarity between two or more time series, computed through correlation, coherence, or similar measures) is proportional to physiological connectivity between the brain areas generating these time series. There are nevertheless pitfalls in interpretation of connectivity measures due to our limited understanding of their underlying physiology, e.g., hidden sources, differential sensor sensitivity for different kind of synaptic activity, etc.

**Statistical power.** The low statistical power in the reviewed studies may be misleading. With a sample size typical of these studies (we take  $N = 15$  per group for this example), the power of a two-tail two-sample t-test with a significance level at 0.05 is only 0.26 for a size-effect considered as medium (Cohen's  $d$  at 0.5). That is, three studies out of four will report

negative results for medium-sized differences in brain connectivity. Controlling for multiple comparisons further reduces the power of these tests such that only very strong effects may be reliably detected in most studies. When applied to the Fig 2, this implies that potential counter-evidence regarding underconnectivity can only be provided by studies reporting overconnectivity (and vice-versa) for comparable frequency bands, and, importantly, not by studies reporting inconclusive results.

**Publication bias:** As mentioned previously, the context of individual studies may impact on obtained results. When results are grouped, these contexts are partly lost and this can produce a bias in the overall conclusions. That is, studies looking for specific information (e.g., gamma activity over long-distance connections) may report specific findings (e.g., under-connectivity) which would not be the main outcome if they had investigated a broader context (e.g., connectivity of gamma activity in general). This creates a potential publication bias where topic of high interest is generally more scrutinized, resulting in the publication of more positive findings.

**Head and brain size.** The significant bias in head and brain size between ASD and NT participants may result in biases impacting the distance between EEG sensors and the properties of electrical signal propagation from the cortex to the scalp. Differences in brain size (not head size) may also have some effect on the signal-to-noise ratio in MEG since the cortical surface is in average closer to the sensors for larger brains. This effect is expected to be more important in children since brain size differences between ASD and NT are larger at this age. Entering these factors as co-variables in statistical analyses is advisable to control their impact on group comparisons of brain connectivity. Although brain size might not be readily accessible in studies not including MRI scans, standard metrics for the head size are easily measured (e.g., standard head measuring procedures are defined in any 10/20 EEG electrode placement manual).

**Volume conduction and assessment of short-range connectivity in EEG/MEG.** We noted that, compared to long-range functional connectivity, studies of local connectivity are more scarce. This pattern might be related to intrinsic limitations of EEG and MEG recording modalities for evaluating short-range connectivity, particularly in coherence analyses performed at sensor level. To record an EEG/MEG potential, a large pool (around 50,000) of synchronously activated cells with parallel apical dendrites (i.e., pyramidal cells) spanning a cortical patch of 40–200 mm<sup>2</sup> is required [173]. This has two implications. First, it means that simple power analysis could be used to assess local connectivity—with higher EEG/MEG power indicating larger local connectivity—if between-subject comparisons were not biased by various factors such as the conductivities of the skull and other tissues that can cause a general offset of power measurements. Although EEG/MEG power studies were out of the scope of the current review, it is relevant to note that a recent review of this literature has shown no consistent pattern of altered EEG/MEG power in ASD. It suggest that the literature is more supportive of an increased variability of EEG/MEG responses in ASD [174] (see, however, [175] for a recent study that challenges this theory).

Second, the localization on the scalp of such cortical sources is intrinsically limited by the spatial extent of the cell assembly necessary to generate a recordable potential. More importantly, this theoretical spatial resolution is affected by a smearing of the electrical activity as it travels from the cortical (or sub-cortical) sources to the sensors. For EEG, potentials are reaching sensors through omnidirectional volume conduction. For that reason, they spread over larger territories than the initial source area and create severe biases when estimating coherence between close sensors (< 10 cm) [176]. This phenomenon can induce false between-group differences if autism is correlated with differences in global electromagnetic properties of the head tissues, such as impedances of the different layer of tissues (scalp, skull, dura mater,

etc.). Observed differences in extra-axial fluid in infants who develop ASD [177] is one such factor that may be confounding coherence results. The effect of field spread due to volume conduction is less severe in MEG, but is still present. At sensor-level, different approaches (e.g., phase lag index, imaginary part of coherency) have been devised to remove zero-lag activity between different sensors on account that such an activity can be associated with volume conduction. Such approaches, however, discard any potential physiological connectivity with zero-lag that can emerge in systems with feedback-loops such as neural networks [178]. Further, a zero-lag synchronization can be expected in neural oscillators generating large-scale EEG/MEG oscillations [179]. Such zero-lag functional connectivity can be observed experimentally for example in area 17 of the cat visual cortex where initial zero-lag interhemispheric synchronization of neuronal activity can be disrupted by sectioning the corpus callosum [180]. Further, the long-standing hypothesis that volume conduction propagates instantaneously for the frequency range of interest in EEG analysis—an hypothesis depending on the validity of the quasistatic approximation of the Maxwell equations for volume conduction—is challenged by recent experimental work showing propagation delays of volume conducted EEG waves [181].

One way to partly mitigate the problem of volume conduction would be to compute connectivity on EEG sources estimated using more accurate electromagnetic model of the propagation of electrical activity. Although the effect of field spread cannot be completely resolved by the current level of sophistication of source-reconstruction algorithms, such an approach should definitely be used to supplement sensor-level analyses as it reduces the impact of volume conduction and helps better link electrical activity with brain regions [182]. Further, using cortical sources would allow to compute the distance of connections along the cortical sheet, which would provide a much better estimated of distances for correlational analyses than the bird fly distance between sensors (i.e., two sensors above two nearby gyri may be close-by but connections must be significantly longer to follow the cortical sheet forming a sulcus between these two gyri).

**Discriminant validity.** Our review is limited to EEG/MEG functional connectivity in ASD, but future work should also help clarify cross-cutting issue common to multiple neurodevelopmental conditions. It remains to be established if the pattern of connectivity we observed in ASD is specific to the condition or alternatively reflects a more general pattern of changes common to a broad group of neurodevelopmental disorders [183].

## Conclusion and future directions

This review illustrates the large heterogeneity of both the methods and the results of studies investigating brain electrophysiological connectivity in ASD. Some of this variability might be reduced by further improving the methods adopted (e.g. using source reconstruction, better controlling for ASD phenotypes).

Research on electrophysiological functional connectivity in autism has been pioneered by EEG coherence analyses performed on small sensor grids, which provided crude connectivity assessment between very large brain regions (e.g., lobes). Currently, high-density grids are available in EEG and are included by default in every MEG system. Furthermore, algorithms for the estimation of cortical (and even sub-cortical [184]) sources from recorded activity have been developed and are now routinely used in a large body of studies presenting both time- and spatially-resolved brain activations and connectivity. Only one EEG study has benefited from this potential, whereas half of MEG studies did. Results from this latter subset of researches are generally more convincing, not only because source reconstruction helps in mitigating confounders such as volume conduction [182], but also because they associate observed activity with specific brain structures. Because they are non-invasive, cheap, and can

be made widely available for clinical applications, small-grid sensor-level analyses have some potential for the development of biomarkers for diagnostic purposes and potentially to close a biofeedback loop in experimental therapeutic approaches. However, high-density grids combined with sensor-level and source-level analyses provide a much more fertile ground for building and testing hypotheses and theories on functional connectivity in autism.

Studies examining individual variability within ASD and across neurodevelopmental conditions remain very sparse and future studies need to pay more attention to mapping connectivity onto phenotypic differences. The use of functional connectivity features for diagnostic application is also relevant since high accuracy (85–95%) has been reported by many independent research teams [88,97,102,125,126,135]. However, how such biomarkers would perform in infants for an early diagnosis is still an open question and fraught with several pragmatic and ethical complications [185].

A clearer theoretical foundation is necessary to efficiently establish the role of connectivity length with respect to over/under-connectivity using EEG/MEG functional connectivity. Strong theoretical grounding can help address outstanding questions in Table 1.

Further work is also needed to better understand the complex interactions between frequency bands, brain regions, physiology of EEG/MEG oscillators (e.g., roles of specific cell types, neurotransmitters, ion channels; see [186]), and how they relate to different cognitive processes. Specific task-/event-related protocol will need to be devised to disentangle these different dimensions in a principled way. This knowledge is instrumental in designing future studies that could link together ASD symptoms, brain processes, and connectivity abnormalities.

Finally, given the nonlinear evolution of brain properties (e.g., size, white matter integrity, connectivity, etc.), the developmental evolution of these properties strikes us as a very important area of investigation since these changes are generating confusion in interpretation of the current literature. Aside from helping to reconcile apparent contradictions in the literature, a better understanding of how developmental factors induce ASD-related brain changes early in development would provide invaluable insights on the pathogenesis of ASD. Performing such analyses in a multi-modal framework may also further our understanding of the dynamics of ASD-related abnormalities in brain connectivity and help resolve some of the apparent contradictions arising when comparing results across modalities.

**Table 1. Research questions needing clear answers to provide a solid foundation for linking connection length versus EEG/MEG functional connectivity in autism.**

1. How could short and long-range connectivity be clearly defined based on unambiguous biological substrates, e.g., using anatomical concepts which can be directly measured/imaged such as cortical columns, gyri, cerebral lobes, etc.?
2. Are short and long-range connectivity distinct concepts (i.e., physiologically different) or is connectivity better captured as a dimension? Accordingly, should long versus short-range connectivity be assessed as a categorical problem (e.g., using ANOVA) or as a continuous one (e.g., using correlational analysis)?
3. What are the most appropriate methods to measure short and long-range connections in EEG/MEG? What confounds need to be more systematically controlled for (e.g., head circumference, brain volume)?
4. Should EEG/MEG power (a point measurement) or a connectivity metric (i.e., a two-point measurement) be used for the assessment of local activity?
5. Considering that volume conduction might have a non-zero-lag component and genuine connectivity is likely to have a zero-lag component, how should volume conduction be controlled for when measuring local connectivity?
6. How are frequency bands associated with EEG/MEG functional connection length and over/under-connectivity in autism given the current knowledge about the role of these different frequency bands in top-down/bottom-up integration/segregation and given the pathophysiology models accounting for autism symptomatology?

<https://doi.org/10.1371/journal.pone.0175870.t001>

## Supporting information

**S1 File. PRISMA 2009 checklist.**

(DOC)

**S2 File. Detailed synthesis per methodological dimensions.**

(DOCX)

**S1 Table. Included papers investigating EEG functional and/or effective connectivity in ASD.**

(DOCX)

**S2 Table. Included papers investigating MEG functional and/or effective connectivity in ASD.**

(DOCX)

## Acknowledgments

The authors want to acknowledge the contribution of Mai Khalil who has provided guidance regarding the methodology of the systematic review.

## Author Contributions

**Conceptualization:** CO JL ME.

**Funding acquisition:** ME.

**Investigation:** CO.

**Methodology:** CO ME.

**Project administration:** ME.

**Supervision:** ME.

**Visualization:** CO.

**Writing – original draft:** CO.

**Writing – review & editing:** CO JL ME.

## References

1. Wolff JJ, Gu H, Gerig G, Elison JT, Styner M, Gouttard S, et al. Differences in white matter fiber tract development present from 6 to 24 months in infants with autism. *Am J Psychiatry*. 2012; 169: 589–600. <https://doi.org/10.1176/appi.ajp.2011.11091447> PMID: 22362397
2. Wolff JJ, Gerig G, Lewis JD, Soda T, Styner MA, Vachet C, et al. Altered corpus callosum morphology associated with autism over the first 2 years of life. *Brain*. England; 2015; 138: 2046–2058. <https://doi.org/10.1093/brain/awv118> PMID: 25937563
3. Jin Y, Wee C-Y, Shi F, Thung K-H, Yap P-T, Shen D. Identification of Infants at Risk for Autism Using Multi-parameter Hierarchical White Matter Connectomes. *Machine learning in medical imaging. MLMI (Workshop)*. 2015. pp. 170–177.
4. Hughes JR. Autism: the first firm finding = underconnectivity? *Epilepsy Behav*. 2007; 11: 20–24. <https://doi.org/10.1016/j.yebeh.2007.03.010> PMID: 17531541
5. Just MA, Cherkassky VL, Keller TA, Minshew NJ. Cortical activation and synchronization during sentence comprehension in high-functioning autism: evidence of underconnectivity. *Brain*. 2004; 127: 1811–1821. <https://doi.org/10.1093/brain/awh199> PMID: 15215213

6. Belmonte MK, Allen G, Beckel-Mitchener A, Boulanger LM, Carper RA, Webb SJ. Autism and abnormal development of brain connectivity. *J Neurosci. United States*; 2004; 24: 9228–9231. <https://doi.org/10.1523/JNEUROSCI.3340-04.2004> PMID: 15496656
7. Kana RK, Uddin LQ, Kenet T, Chugani D, Müller R-A. Brain connectivity in autism. *Front Hum Neurosci. Frontiers Media S.A.*; 2014; 8: 349. <https://doi.org/10.3389/fnhum.2014.00349> PMID: 24917800
8. Anagnostou E, Taylor MJ. Review of neuroimaging in autism spectrum disorders: what have we learned and where we go from here. *Mol Autism*. 2011; 2: 4. <https://doi.org/10.1186/2040-2392-2-4> PMID: 21501488
9. McFadden K, Minshew N. Evidence for Dysregulation of Axonal Growth and Guidance in the Etiology of ASD. *Front Hum Neurosci*. 2013; 7.
10. Müller R-A. Anatomical and Functional Connectivity in Autism Spectrum Disorders. In: Patel VB, Preedy VR, Martin CR, editors. *Comprehensive Guide to Autism*. Springer New York; 2014. pp. 49–75.
11. Thai NJ, Longe O, Rippon G. Disconnected brains: what is the role of fMRI in connectivity research? *Int J Psychophysiol*. 2009; 73: 27–32. Available: <http://www.ncbi.nlm.nih.gov/pubmed/19530277> PMID: 19530277
12. Uddin LQ, Supekar K, Lynch CJ, Khouzam A, Phillips J, Feinstein C, et al. Salience network-based classification and prediction of symptom severity in children with autism. *JAMA Psychiatry*. 2013; 70: 869–879. <https://doi.org/10.1001/jamapsychiatry.2013.104> PMID: 23803651
13. Wang J, Barstein J, Ethridge LE, Mosconi MW, Takarae Y, Sweeney JA. Resting state EEG abnormalities in autism spectrum disorders. *J Neurodev Disord*. 2013; 5: 24. <https://doi.org/10.1186/1866-1955-5-24> PMID: 24040879
14. Reid AT, Lewis J, Bezgin G, Khundrakpam B, Eickhoff SB, McIntosh AR, et al. A cross-modal, cross-species comparison of connectivity measures in the primate brain. *Neuroimage*. 2015; 125: 311–331. <https://doi.org/10.1016/j.neuroimage.2015.10.057> PMID: 26515902
15. Horwitz B. The elusive concept of brain connectivity. *Neuroimage*. 2003; 19: 466–470. Available: <http://www.ncbi.nlm.nih.gov/pubmed/12814595> PMID: 12814595
16. Friston KJ. Functional and effective connectivity in neuroimaging: A synthesis. *Hum Brain Mapp*. Wiley; 1994; 2: 56–78.
17. Jones SE, Beall EB, Najm I, Sakaie KE, Phillips MD, Zhang M, et al. Low consistency of four brain connectivity measures derived from intracranial electrode measurements. *Front Neurol*. 2014; 5: 272. <https://doi.org/10.3389/fneur.2014.00272> PMID: 25566178
18. Silberberg G, Grillner S, LeBeau FEN, Maex R, Markram H. Synaptic pathways in neural microcircuits. *Trends Neurosci*. 2005; 28: 541–551. <https://doi.org/10.1016/j.tins.2005.08.004> PMID: 16122815
19. Nunez PL, Silberstein RB. On the relationship of synaptic activity to macroscopic measurements: does co-registration of EEG with fMRI make sense? *Brain Topogr*. 2000; 13: 79–96. PMID: 11154104
20. Pineda JA. The functional significance of mu rhythms: translating “seeing” and “hearing” into “doing.” *Brain Res Brain Res Rev*. 2005; 50: 57–68. <https://doi.org/10.1016/j.brainresrev.2005.04.005> PMID: 15925412
21. Lachaux JP, Fonlupt P, Kahane P, Minotti L, Hoffmann D, Bertrand O, et al. Relationship between task-related gamma oscillations and BOLD signal: new insights from combined fMRI and intracranial EEG. *Hum Brain Mapp*. 2007; 28: 1368–1375. <https://doi.org/10.1002/hbm.20352> PMID: 17274021
22. Nir Y, Fisch L, Mukamel R, Gelbard-Sagiv H, Arieli A, Fried I, et al. Coupling between neuronal firing rate, gamma LFP, and BOLD fMRI is related to interneuronal correlations. *Curr Biol*. 2007; 17: 1275–1285. <https://doi.org/10.1016/j.cub.2007.06.066> PMID: 17686438
23. Blinowska KJ. Review of the methods of determination of directed connectivity from multichannel data. *Med Biol Eng Comput*. 2011; 49: 521–529. <https://doi.org/10.1007/s11517-011-0739-x> PMID: 21298355
24. Bastos AM, Schoffelen J-M. A Tutorial Review of Functional Connectivity Analysis Methods and Their Interpretational Pitfalls [Internet]. *Frontiers in Systems Neuroscience*. 2016. p. 175. Available: <http://journal.frontiersin.org/article/10.3389/fnsys.2015.00175> <https://doi.org/10.3389/fnsys.2015.00175> PMID: 26778976
25. Courchesne E, Pierce K. Why the frontal cortex in autism might be talking only to itself: local over-connectivity but long-distance disconnection. *Curr Opin Neurobiol*. 2005; 15: 225–230. <https://doi.org/10.1016/j.conb.2005.03.001> PMID: 15831407
26. Vissers ME, X Cohen M, Geurts HM. Brain connectivity and high functioning autism: A promising path of research that needs refined models, methodological convergence, and stronger behavioral links. *Neurosci Biobehav Rev*. 2012; 36: 604–625. <https://doi.org/10.1016/j.neubiorev.2011.09.003> PMID: 21963441



27. Picci G, Gotts SJ, Scherf KS. A theoretical rut: revisiting and critically evaluating the generalized under/over-connectivity hypothesis of autism. *Dev Sci. England*; 2016; 19: 524–549. <https://doi.org/10.1111/desc.12467> PMID: 27412228
28. Alexander AL, Lee JE, Lazar M, Boudos R, DuBray MB, Oakes TR, et al. Diffusion tensor imaging of the corpus callosum in Autism. *Neuroimage*. 2007; 34: 61–73. <https://doi.org/10.1016/j.neuroimage.2006.08.032> PMID: 17023185
29. Brito AR, Vasconcelos MM, Domingues RC, Hygino da Cruz LC Jr., Rodrigues Lde S, Gasparetto EL, et al. Diffusion tensor imaging findings in school-aged autistic children. *J Neuroimaging*. 2009; 19: 337–343. <https://doi.org/10.1111/j.1552-6569.2009.00366.x> PMID: 19490374
30. Casanova MF, El-Baz A, Elnakib A, Switala AE, Williams EL, Williams DL, et al. Quantitative analysis of the shape of the corpus callosum in patients with autism and comparison individuals. *Autism*. 2011; 15: 223–238. <https://doi.org/10.1177/1362361310386506> PMID: 21363871
31. Egaas B, Courchesne E, Saitoh O. Reduced size of corpus callosum in autism. *Arch Neurol*. 1995; 52: 794–801. PMID: 7639631
32. Hardan AY, Minshew NJ, Keshavan MS. Corpus callosum size in autism. *Neurology*. 2000; 55: 1033–1036. PMID: 11061265
33. Hong S, Ke X, Tang T, Hang Y, Chu K, Huang H, et al. Detecting abnormalities of corpus callosum connectivity in autism using magnetic resonance imaging and diffusion tensor tractography. *Psychiatry Res*. 2011; 194: 333–339. <https://doi.org/10.1016/j.psychres.2011.03.009> PMID: 22047729
34. Keary CJ, Minshew NJ, Bansal R, Goradia D, Fedorov S, Keshavan MS, et al. Corpus callosum volume and neurocognition in autism. *J Autism Dev Disord*. 2009; 39: 834–841. <https://doi.org/10.1007/s10803-009-0689-4> PMID: 19165587
35. Keller TA, Kana RK, Just MA. A developmental study of the structural integrity of white matter in autism. *Neuroreport*. 2007; 18: 23–27. <https://doi.org/10.1097/01.wnr.0000239965.21685.99> PMID: 17259855
36. Manes F, Piven J, Vrancic D, Nanclares V, Plebst C, Starkstein SE. An MRI study of the corpus callosum and cerebellum in mentally retarded autistic individuals. *J Neuropsychiatry Clin Neurosci*. 1999; 11: 470–474. <https://doi.org/10.1176/jnp.11.4.470> PMID: 10570760
37. Piven J, Bailey J, Ranson BJ, Arndt S. An MRI study of the corpus callosum in autism. *Am J Psychiatry*. 1997; 154: 1051–1056. Available: <http://www.ncbi.nlm.nih.gov/pubmed/9247388> <https://doi.org/10.1176/ajp.154.8.1051> PMID: 9247388
38. Stanfield AC, McIntosh AM, Spencer MD, Philip R, Gaur S, Lawrie SM. Towards a neuroanatomy of autism: a systematic review and meta-analysis of structural magnetic resonance imaging studies. *Eur Psychiatry*. 2008; 23: 289–299. <https://doi.org/10.1016/j.eurpsy.2007.05.006> PMID: 17765485
39. Travers BG, Adluru N, Ennis C, Tromp do PM, Destiche D, Doran S, et al. Diffusion tensor imaging in autism spectrum disorder: a review. *Autism Res*. 2012; 5: 289–313. <https://doi.org/10.1002/aur.1243> PMID: 22786754
40. Vidal CN, Nicolson R, DeVito TJ, Hayashi KM, Geaga JA, Drost DJ, et al. Mapping corpus callosum deficits in autism: an index of aberrant cortical connectivity. *Biol Psychiatry*. 2006; 60: 218–225. <https://doi.org/10.1016/j.biopsych.2005.11.011> PMID: 16460701
41. Rane P, Cochran D, Hodge SM, Haselgrove C, Kennedy DN, Frazier JA. Connectivity in Autism: A Review of MRI Connectivity Studies. *Harv Rev Psychiatry*. United States; 2015; 23: 223–244. <https://doi.org/10.1097/HRP.0000000000000072> PMID: 26146755
42. Piven J, Arndt S, Bailey J, Andreasen N. Regional brain enlargement in autism: a magnetic resonance imaging study. *J Am Acad Child Adolesc Psychiatry*. 1996; 35: 530–536. <https://doi.org/10.1097/00004583-199604000-00020> PMID: 8919716
43. Muller RA, Shih P, Keehn B, Deyoe JR, Leyden KM, Shukla DK. Underconnected, but how? A survey of functional connectivity MRI studies in autism spectrum disorders. *Cereb Cortex*. 2011; 21: 2233–2243. <https://doi.org/10.1093/cercor/bhq296> PMID: 21378114
44. Wass S. Distortions and disconnections: disrupted brain connectivity in autism. *Brain Cogn*. 2011; 75: 18–28. <https://doi.org/10.1016/j.bandc.2010.10.005> PMID: 21055864
45. Casanova MF, El-Baz A, Vanbogaert E, Narahari P, Trippe J. Minicolumnar width: Comparison between supragranular and infragranular layers. *J Neurosci Methods*. 2009; 184: 19–24. <https://doi.org/10.1016/j.jneumeth.2009.07.011> PMID: 19616026
46. Rubenstein JL, Merzenich MM. Model of autism: increased ratio of excitation/inhibition in key neural systems. *Genes Brain Behav*. 2003; 2: 255–267. PMID: 14606691
47. Nelson SB, Valakh V. Excitatory/Inhibitory Balance and Circuit Homeostasis in Autism Spectrum Disorders. *Neuron*. United States; 2015; 87: 684–698. <https://doi.org/10.1016/j.neuron.2015.07.033> PMID: 26291155

48. Cellot G, Cherubini E. GABAergic signaling as therapeutic target for autism spectrum disorders. *Front Pediatr*. 2014; 2: 70. <https://doi.org/10.3389/fped.2014.00070> PMID: 25072038
49. Lund JS, Angelucci A, Bressloff PC. Anatomical Substrates for Functional Columns in Macaque Monkey Primary Visual Cortex. *Cereb Cortex*. 2003; 13: 15–24. PMID: 12466211
50. Sohal VS, Zhang F, Yizhar O, Deisseroth K. Parvalbumin neurons and gamma rhythms enhance cortical circuit performance. *Nature*. 2009; 459: 698–702. <https://doi.org/10.1038/nature07991> PMID: 19396159
51. Kopell N, Ermentrout GB, Whittington MA, Traub RD. Gamma rhythms and beta rhythms have different synchronization properties. *Proc Natl Acad Sci U S A*. 2000; 97: 1867–1872. PMID: 10677548
52. von Stein A, Sarnthein J. Different frequencies for different scales of cortical integration: from local gamma to long range alpha/theta synchronization. *Int J Psychophysiol*. 2000; 38: 301–313. PMID: 11102669
53. Fries P. Neuronal gamma-band synchronization as a fundamental process in cortical computation. *Annu Rev Neurosci*. 2009; 32: 209–224. <https://doi.org/10.1146/annurev.neuro.051508.135603> PMID: 19400723
54. Rojas DC, Wilson LB. Gamma-band abnormalities as markers of autism spectrum disorders. *Biomark Med*. 2014; 8: 353–368. <https://doi.org/10.2217/bmm.14.15> PMID: 24712425
55. Courchesne E, Campbell K, Solso S. Brain growth across the life span in autism: age-specific changes in anatomical pathology. *Brain Res*. 2011; 1380: 138–145. <https://doi.org/10.1016/j.brainres.2010.09.101> PMID: 20920490
56. Zikopoulos B, Barbas H. Changes in prefrontal axons may disrupt the network in autism. *J Neurosci*. 2010; 30: 14595–14609. <https://doi.org/10.1523/JNEUROSCI.2257-10.2010> PMID: 21048117
57. Morgan JT, Chana G, Abramson I, Semendeferi K, Courchesne E, Everall IP. Abnormal microglial-neuronal spatial organization in the dorsolateral prefrontal cortex in autism. *Brain Res*. 2012; 1456: 72–81. <https://doi.org/10.1016/j.brainres.2012.03.036> PMID: 22516109
58. Just MA, Keller TA, Malave VL, Kana RK, Varma S. Autism as a neural systems disorder: a theory of frontal-posterior underconnectivity. *Neurosci Biobehav Rev*. 2012; 36: 1292–1313. <https://doi.org/10.1016/j.neubiorev.2012.02.007> PMID: 22353426
59. Just MA, Cherkassky VL, Keller TA, Kana RK, Minshew NJ. Functional and anatomical cortical underconnectivity in autism: evidence from an fMRI study of an executive function task and corpus callosum morphometry. *Cereb Cortex*. 2007; 17: 951–961. <https://doi.org/10.1093/cercor/bhl006> PMID: 16772313
60. Cherkassky VL, Kana RK, Keller TA, Just MA. Functional connectivity in a baseline resting-state network in autism. *Neuroreport*. 2006; 17: 1687–1690. <https://doi.org/10.1097/01.wnr.0000239956.45448.4c> PMID: 17047454
61. Lewis JD, Evans AC, Pruett JR, Botteron K, Zwaigenbaum L, Estes A, et al. Network inefficiencies in autism spectrum disorder at 24 months. *Transl Psychiatry*. 2014; 4: e388. <https://doi.org/10.1038/tp.2014.24> PMID: 24802306
62. Amaral DG, Schumann CM, Nordahl CW. Neuroanatomy of autism. *Trends Neurosci*. 2008; 31: 137–145. <https://doi.org/10.1016/j.tins.2007.12.005> PMID: 18258309
63. Batty M, Meaux E, Wittenmeyer K, Roge B, Taylor MJ. Early processing of emotional faces in children with autism: An event-related potential study. *J Exp Child Psychol*. 2011; 109: 430–444. <https://doi.org/10.1016/j.jecp.2011.02.001> PMID: 21458825
64. Hyde KL, Samson F, Evans AC, Mottron L. Neuroanatomical differences in brain areas implicated in perceptual and other core features of autism revealed by cortical thickness analysis and voxel-based morphometry. *Hum Brain Mapp*. 2010; 31: 556–566. <https://doi.org/10.1002/hbm.20887> PMID: 19790171
65. Jemel B, Mimeault D, Saint-Amour D, Hosen A, Mottron L. VEP contrast sensitivity responses reveal reduced functional segregation of mid and high filters of visual channels in autism. *J Vis*. 2010; 10: 13.
66. Vandenbroucke MW, Scholte HS, van Engeland H, Lamme VA, Kemner C. A neural substrate for atypical low-level visual processing in autism spectrum disorder. *Brain*. 2008; 131: 1013–1024. <https://doi.org/10.1093/brain/awm321> PMID: 18192288
67. Di Martino A, Yan C-G, Li Q, Denio E, Castellanos FX, Alaerts K, et al. The autism brain imaging data exchange: towards a large-scale evaluation of the intrinsic brain architecture in autism. *Mol Psychiatry*. 2014; 19: 659–667. <https://doi.org/10.1038/mp.2013.78> PMID: 23774715
68. Lewis JD, Theilmann RJ, Townsend J, Evans AC. Network efficiency in autism spectrum disorder and its relation to brain overgrowth. *Front Hum Neurosci*. 2013; 7: 845. <https://doi.org/10.3389/fnhum.2013.00845> PMID: 24368901

69. Hahamy A, Behrmann M, Malach R. The idiosyncratic brain: distortion of spontaneous connectivity patterns in autism spectrum disorder. *Nat Neurosci.* 2015; 18: 302–309. <https://doi.org/10.1038/nn.3919> PMID: 25599222
70. Ben Bashat D, Kronfeld-Duenias V, Zachor DA, Ekstein PM, Hendler T, Tarrasch R, et al. Accelerated maturation of white matter in young children with autism: a high b value DWI study. *Neuroimage.* 2007; 37: 40–47. <https://doi.org/10.1016/j.neuroimage.2007.04.060> PMID: 17566764
71. Weinstein M, Ben-Sira L, Levy Y, Zachor DA, Ben Itzhak E, Artzi M, et al. Abnormal white matter integrity in young children with autism. *Hum Brain Mapp.* 2011; 32: 534–543. <https://doi.org/10.1002/hbm.21042> PMID: 21391246
72. Barnea-Goraly N, Kwon H, Menon V, Eliez S, Lotspeich L, Reiss AL. White matter structure in autism: preliminary evidence from diffusion tensor imaging. *Biol Psychiatry.* 2004; 55: 323–326. PMID: 14744477
73. Courchesne E, Pierce K, Schumann CM, Redcay E, Buckwalter JA, Kennedy DP, et al. Mapping early brain development in autism. *Neuron.* 2007; 56: 399–413. <https://doi.org/10.1016/j.neuron.2007.10.016> PMID: 17964254
74. Billeci L, Calderoni S, Tosetti M, Catani M, Muratori F. White matter connectivity in children with autism spectrum disorders: a tract-based spatial statistics study. *BMC Neurol.* 2012; 12: 148. <https://doi.org/10.1186/1471-2377-12-148> PMID: 23194030
75. LaMantia AS, Rakic P. Axon overproduction and elimination in the corpus callosum of the developing rhesus monkey. *J Neurosci.* 1990; 10: 2156–2175. PMID: 2376772
76. van Ooyen A, Willshaw DJ. Competition for neurotrophic factor in the development of nerve connections. *Proc Biol Sci.* 1999; 266: 883–892. <https://doi.org/10.1098/rspb.1999.0719> PMID: 10380678
77. Lewis JD, Theilmann RJ, Fonov V, Bellec P, Lincoln A, Evans AC, et al. Callosal fiber length and inter-hemispheric connectivity in adults with autism: brain overgrowth and underconnectivity. *Hum Brain Mapp.* 2013; 34: 1685–1695. <https://doi.org/10.1002/hbm.22018> PMID: 22359385
78. Lewis JD, Elman JL. Growth-related neural reorganization and the autism phenotype: a test of the hypothesis that altered brain growth leads to altered connectivity. *Dev Sci.* 2008; 11: 135–155. <https://doi.org/10.1111/j.1467-7687.2007.00634.x> PMID: 18171375
79. Batardiere A, Barone P, Knoblauch K, Giroud P, Berland M, Dumas AM, et al. Early specification of the hierarchical organization of visual cortical areas in the macaque monkey. *Cereb Cortex.* 2002; 12: 453–465. PMID: 11950763
80. Washington SD, Gordon EM, Brar J, Warburton S, Sawyer AT, Wolfe A, et al. Dysmaturation of the default mode network in autism. *Hum Brain Mapp.* 2014; 35: 1284–1296. <https://doi.org/10.1002/hbm.22252> PMID: 23334984
81. Wiggins JL, Peltier SJ, Ashinoff S, Weng SJ, Carrasco M, Welsh RC, et al. Using a self-organizing map algorithm to detect age-related changes in functional connectivity during rest in autism spectrum disorders. *Brain Res.* 2011; 1380: 187–197. <https://doi.org/10.1016/j.brainres.2010.10.102> PMID: 21047495
82. Sowell ER, Thompson PM, Holmes CJ, Jernigan TL, Toga AW. In vivo evidence for post-adolescent brain maturation in frontal and striatal regions. *Nat Neurosci.* 1999; 2: 859–861. <https://doi.org/10.1038/13154> PMID: 10491602
83. Billeci L, Sicca F, Maharatna K, Apicella F, Narzisi A, Campatelli G, et al. On the application of quantitative EEG for characterizing autistic brain: a systematic review. *Front Hum Neurosci.* 2013; 7: 442. <https://doi.org/10.3389/fnhum.2013.00442> PMID: 23935579
84. Coben R, Mohammad-Rezazadeh I, Cannon RL. Using quantitative and analytic EEG methods in the understanding of connectivity in autism spectrum disorders: a theory of mixed over- and under-connectivity. *Front Hum Neurosci.* 2014; 8: 45. <https://doi.org/10.3389/fnhum.2014.00045> PMID: 24616679
85. Sheikhan A, Behnam H, Mohammadi MR, Noroozian M, Mohammadi M. Detection of abnormalities for diagnosing of children with autism disorders using of quantitative electroencephalography analysis. *J Med Syst.* 2012; 36: 957–963. <https://doi.org/10.1007/s10916-010-9560-6> PMID: 20711644
86. Rezaie R, Zouridakis G, Choudhri AF, Wheless JW, Völgyi E, Van Poppel K, et al. Functional connectivity in tuberous sclerosis complex with autistic spectrum disorder preliminary findings. *J Pediatr Neurol.* 2013; 11: 79–82.
87. Ghanbari Y, Bloy L, Christopher Edgar J, Blaskey L, Verma R, Roberts TP. Joint analysis of band-specific functional connectivity and signal complexity in autism. *J Autism Dev Disord.* 2015; 45: 444–460. <https://doi.org/10.1007/s10803-013-1915-7> PMID: 23963593

88. Ahmadlou M, Adeli H, Adeli A. Fuzzy Synchronization Likelihood-wavelet methodology for diagnosis of autism spectrum disorder. *J Neurosci Methods*. 2012; 211: 203–209. <https://doi.org/10.1016/j.jneumeth.2012.08.020> PMID: 22968137
89. Barttfeld P, Amoruso L, Ais J, Cukier S, Bavassi L, Tomio A, et al. Organization of brain networks governed by long-range connections index autistic traits in the general population. *J Neurodev Disord*. 2013; 5: 16. <https://doi.org/10.1186/1866-1955-5-16> PMID: 23806204
90. Barttfeld P, Wicker B, Cukier S, Navarta S, Lew S, Sigman M. A big-world network in ASD: dynamical connectivity analysis reflects a deficit in long-range connections and an excess of short-range connections. *Neuropsychologia*. 2011; 49: 254–263. <https://doi.org/10.1016/j.neuropsychologia.2010.11.024> PMID: 21110988
91. Boersma M, Kemner C, de Reus MA, Collin G, Snijders TM, Hofman D, et al. Disrupted functional brain networks in autistic toddlers. *Brain Connect*. 2013; 3: 41–49. <https://doi.org/10.1089/brain.2012.0127> PMID: 23259692
92. Buckley AW, Scott R, Tyler A, Mahoney JM, Thurm A, Farmer C, et al. State-Dependent Differences in Functional Connectivity in Young Children With Autism Spectrum Disorder. *EBioMedicine*. 2015; 2: 1905–1915. <https://doi.org/10.1016/j.ebiom.2015.11.004> PMID: 26844269
93. Carson AM, Salowitz NM, Scheidt RA, Dolan BK, Van Hecke A V. Electroencephalogram coherence in children with and without autism spectrum disorders: decreased interhemispheric connectivity in autism. *Autism Res*. 2014; 7: 334–343. <https://doi.org/10.1002/aur.1367> PMID: 24623657
94. Catarino A, Andrade A, Churches O, Wagner AP, Baron-Cohen S, Ring H. Task-related functional connectivity in autism spectrum conditions: an EEG study using wavelet transform coherence. *Mol Autism*. 2013; 4: 1. <https://doi.org/10.1186/2040-2392-4-1> PMID: 23311570
95. Chan AS, Han YMY, Sze SL, Lau EM. Neuroenhancement of Memory for Children with Autism by a Mind-Body Exercise. *Front Psychol*. 2015; 6: 1893. <https://doi.org/10.3389/fpsyg.2015.01893> PMID: 26696946
96. Coben R, Clarke AR, Hudspeth W, Barry RJ. EEG power and coherence in autistic spectrum disorder. *Clin Neurophysiol*. 2008; 119: 1002–1009. <https://doi.org/10.1016/j.clinph.2008.01.013> PMID: 18331812
97. Duffy FH, Als H. A stable pattern of EEG spectral coherence distinguishes children with autism from neuro-typical controls—a large case control study. *BMC Med*. 2012; 10: 64. <https://doi.org/10.1186/1741-7015-10-64> PMID: 22730909
98. Duffy FH, Shankardass A, McNulty GB, Als H. The relationship of Asperger's syndrome to autism: a preliminary EEG coherence study. *BMC Med*. 2013; 11: 175. <https://doi.org/10.1186/1741-7015-11-175> PMID: 23902729
99. Garcia Dominguez L, Stieben J, Perez Velazquez JL, Shanker S. The imaginary part of coherency in autism: differences in cortical functional connectivity in preschool children. *PLoS One*. 2013; 8: e75941. <https://doi.org/10.1371/journal.pone.0075941> PMID: 24098409
100. Isler JR, Martien KM, Grieve PG, Stark RI, Herbert MR. Reduced functional connectivity in visual evoked potentials in children with autism spectrum disorder. *Clin Neurophysiol*. 2010; 121: 2035–2043. <https://doi.org/10.1016/j.clinph.2010.05.004> PMID: 20605520
101. Jaime M, McMahon CM, Davidson BC, Newell LC, Mundy PC, Henderson HA. Brief Report: Reduced Temporal-Central EEG Alpha Coherence During Joint Attention Perception in Adolescents with Autism Spectrum Disorder. *J Autism Dev Disord*. 2015;
102. Jamal W, Das S, Oprescu IA, Maharatna K, Apicella F, Sicca F. Classification of autism spectrum disorder using supervised learning of brain connectivity measures extracted from synchrostates. *J Neural Eng*. 2014; 11: 46019.
103. Keehn B, Vogel-Farley V, Tager-Flusberg H, Nelson CA. Atypical hemispheric specialization for faces in infants at risk for autism spectrum disorder. *Autism Res*. 2015; 8: 187–198. <https://doi.org/10.1002/aur.1438> PMID: 25808162
104. Khadem A, Hossein-Zadeh G-A, Khorrani A. Long-Range Reduced Predictive Information Transfers of Autistic Youths in EEG Sensor-Space During Face Processing. *Brain Topogr*. 2016; 29: 283–295. <https://doi.org/10.1007/s10548-015-0452-4> PMID: 26433373
105. Kulisek R, Hrcir Z, Hrdlicka M, Faladova L, Sterbova K, Krsek P, et al. Nonlinear analysis of the sleep EEG in children with pervasive developmental disorder. *Neuro Endocrinol Lett*. 2008; 29: 512–517. PMID: 18766147
106. Lazarev V V, Pontes A, Mitrofanov AA, deAzevedo LC. Interhemispheric asymmetry in EEG photic driving coherence in childhood autism. *Clin Neurophysiol*. 2010; 121: 145–152. <https://doi.org/10.1016/j.clinph.2009.10.010> PMID: 19951847

107. Lazarev V V, Pontes A, Mitrofanov AA, deAzevedo LC. Reduced interhemispheric connectivity in childhood autism detected by electroencephalographic photic driving coherence. *J Autism Dev Disord.* 2015; 45: 537–547. <https://doi.org/10.1007/s10803-013-1959-8> PMID: 24097142
108. Leveille C, Barbeau EB, Bolduc C, Limoges E, Berthiaume C, Chevrier E, et al. Enhanced connectivity between visual cortex and other regions of the brain in autism: a REM sleep EEG coherence study. *Autism Res.* 2010; 3: 280–285. <https://doi.org/10.1002/aur.155> PMID: 20717953
109. Machado C, Estevez M, Rodriguez R, Leisman G, Melillo R, Chinchilla M, et al. Anatomic and Functional Connectivity Relationship in Autistic Children during Three Different Experimental Conditions. *Brain Connect.* 2015;
110. Mathewson KJ, Jetha MK, Drmic IE, Bryson SE, Goldberg JO, Schmidt LA. Regional EEG alpha power, coherence, and behavioral symptomatology in autism spectrum disorder. *Clin Neurophysiol.* 2012; 123: 1798–1809. <https://doi.org/10.1016/j.clinph.2012.02.061> PMID: 22405935
111. Matlis S, Boric K, Chu CJ, Kramer MA. Robust disruptions in electroencephalogram cortical oscillations and large-scale functional networks in autism. *BMC Neurol.* 2015; 15: 97. <https://doi.org/10.1186/s12883-015-0355-8> PMID: 26111798
112. Murias M, Webb SJ, Greenson J, Dawson G. Resting state cortical connectivity reflected in EEG coherence in individuals with autism. *Biol Psychiatry.* 2007; 62: 270–273. <https://doi.org/10.1016/j.biopsych.2006.11.012> PMID: 17336944
113. Orekhova E V, Elsabbagh M, Jones EJ, Dawson G, Charman T, Johnson MH, et al. EEG hyper-connectivity in high-risk infants is associated with later autism. *J Neurodev Disord.* 2014; 6: 40. <https://doi.org/10.1186/1866-1955-6-40> PMID: 25400705
114. Peters JM, Taquet M, Vega C, Jeste SS, Fernandez IS, Tan J, et al. Brain functional networks in syndromic and non-syndromic autism: a graph theoretical study of EEG connectivity. *BMC Med.* 2013; 11: 54. <https://doi.org/10.1186/1741-7015-11-54> PMID: 23445896
115. Righi G, Tierney AL, Tager-Flusberg H, Nelson CA. Functional connectivity in the first year of life in infants at risk for autism spectrum disorder: an EEG study. *PLoS One.* 2014; 9: e105176. <https://doi.org/10.1371/journal.pone.0105176> PMID: 25140874
116. Chan AS, Han YMY, Sze SL, Cheung M, Leung WW, Chan RCK, et al. Disordered Connectivity Associated with Memory Deficits in Children with Autism Spectrum Disorders. *Res Autism Spectr Disord.* 2011; 5: 237–245.
117. Han Y, Chan A, Sze S, Cheung M, Wong C, Lam J, et al. Altered immune function associated with disordered neural connectivity and executive dysfunctions: a neurophysiological study on children with autism spectrum disorders. 2013; 7: 662–674.
118. Lázár AS, Lázár ZI, Bíró A, Győri M, Tárnok Z, Prekop C, et al. Reduced fronto-cortical brain connectivity during NREM sleep in Asperger syndrome: An EEG spectral and phase coherence study. *Clin Neurophysiol.* 2010; 121: 1844–1854. <https://doi.org/10.1016/j.clinph.2010.03.054> PMID: 20434395
119. Bangel KA, Batty M, Ye AX, Meaux E, Taylor MJ, Doesburg SM. Reduced beta band connectivity during number estimation in autism. *Neuroimage Clin.* 2014; 6: 202–213. <https://doi.org/10.1016/j.nicl.2014.08.020> PMID: 25379432
120. Buard I, Rogers SJ, Hepburn S, Kronberg E, Rojas DC. Altered oscillation patterns and connectivity during picture naming in autism. *Front Hum Neurosci.* 2013; 7: 742. <https://doi.org/10.3389/fnhum.2013.00742> PMID: 24265611
121. Doesburg SM, Vidal J, Taylor MJ. Reduced Theta Connectivity during Set-Shifting in Children with Autism. *Front Hum Neurosci.* 2013; 7: 785. <https://doi.org/10.3389/fnhum.2013.00785> PMID: 24294201
122. Garcia Dominguez L, Velazquez JL, Galan RF. A model of functional brain connectivity and background noise as a biomarker for cognitive phenotypes: application to autism. *PLoS One.* 2013; 8: e61493. <https://doi.org/10.1371/journal.pone.0061493> PMID: 23613864
123. Perez Velazquez JL, Galan RF. Information gain in the brain's resting state: A new perspective on autism. *Front Neuroinform.* 2013; 7: 37. <https://doi.org/10.3389/fninf.2013.00037> PMID: 24399963
124. Kenet T, Orekhova E V, Bharadwaj H, Shetty NR, Israeli E, Lee AK, et al. Disconnectivity of the cortical ocular motor control network in autism spectrum disorders. *Neuroimage.* 2012; 61: 1226–1234. <https://doi.org/10.1016/j.neuroimage.2012.03.010> PMID: 22433660
125. Khan S, Gramfort A, Shetty NR, Kitzbichler MG, Ganesan S, Moran JM, et al. Local and long-range functional connectivity is reduced in concert in autism spectrum disorders. *Proc Natl Acad Sci U S A.* 2013; 110: 3107–3112. <https://doi.org/10.1073/pnas.1214533110> PMID: 23319621
126. Khan S, Michmizos K, Tommerdahl M, Ganesan S, Kitzbichler MG, Zetino M, et al. Somatosensory cortex functional connectivity abnormalities in autism show opposite trends, depending on direction



- and spatial scale. *Brain*. 2015; 138: 1394–1409. <https://doi.org/10.1093/brain/awv043> PMID: 25765326
127. Kikuchi M, Shitamichi K, Yoshimura Y, Ueno S, Hiraishi H, Hirose T, et al. Altered brain connectivity in 3-to 7-year-old children with autism spectrum disorder. *Neuroimage Clin*. 2013; 2: 394–401. <https://doi.org/10.1016/j.nicl.2013.03.003> PMID: 24179793
  128. Kikuchi M, Yoshimura Y, Shitamichi K, Ueno S, Hirose T, Muneshige T, et al. A custom magnetoencephalography device reveals brain connectivity and high reading/decoding ability in children with autism. *Sci Rep*. 2013; 3: 1139. <https://doi.org/10.1038/srep01139> PMID: 23355952
  129. Kikuchi M, Yoshimura Y, Hiraishi H, Muneshige T, Hashimoto T, Tsubokawa T, et al. Reduced long-range functional connectivity in young children with autism spectrum disorder. *Soc Cogn Affect Neurosci*. 2015; 10: 248–254. <https://doi.org/10.1093/scan/nsu049> PMID: 24652855
  130. Kitzbichler MG, Khan S, Ganesan S, Vangel MG, Herbert MR, Hamalainen MS, et al. Altered development and multifaceted band-specific abnormalities of resting state networks in autism. *Biol Psychiatry*. 2015; 77: 794–804. <https://doi.org/10.1016/j.biopsych.2014.05.012> PMID: 25064418
  131. Lajiness-O'Neill R, Richard AE, Moran JE, Olszewski A, Pawluk L, Jacobson D, et al. Neural synchrony examined with magnetoencephalography (MEG) during eye gaze processing in autism spectrum disorders: preliminary findings. *J Neurodev Disord*. 2014; 6: 15. <https://doi.org/10.1186/1866-1955-6-15> PMID: 24976870
  132. Lau YC, Hinkley LB, Bukshpun P, Strominger ZA, Wakahiro ML, Baron-Cohen S, et al. Autism traits in individuals with agenesis of the corpus callosum. *J Autism Dev Disord*. 2013; 43: 1106–1118. <https://doi.org/10.1007/s10803-012-1653-2> PMID: 23054201
  133. Leung RC, Ye AX, Wong SM, Taylor MJ, Doesburg SM. Reduced beta connectivity during emotional face processing in adolescents with autism. *Mol Autism*. 2014; 5: 51. <https://doi.org/10.1186/2040-2392-5-51> PMID: 25371811
  134. Peiker I, David N, Schneider TR, Nolte G, Schottle D, Engel AK. Perceptual Integration Deficits in Autism Spectrum Disorders Are Associated with Reduced Interhemispheric Gamma-Band Coherence. *J Neurosci*. 2015; 35: 16352–16361. <https://doi.org/10.1523/JNEUROSCI.1442-15.2015> PMID: 26674862
  135. Pollonini L, Patidar U, Situ N, Rezaie R, Papanicolaou AC, Zouridakis G. Functional connectivity networks in the autistic and healthy brain assessed using Granger causality. *Conf Proc IEEE Eng Med Biol Soc*. 2010; 2010: 1730–1733. <https://doi.org/10.1109/IEMBS.2010.5626702> PMID: 21096408
  136. Tsiaras V, Simos PG, Rezaie R, Sheth BR, Garyfallidis E, Castillo EM, et al. Extracting biomarkers of autism from MEG resting-state functional connectivity networks. *Comput Biol Med*. 2011; 41: 1166–1177. <https://doi.org/10.1016/j.compbiomed.2011.04.004> PMID: 21592470
  137. Urbain C, Vogan VM, Ye AX, Pang EW, Doesburg SM, Taylor MJ. Desynchronization of fronto-temporal networks during working memory processing in autism. *Hum Brain Mapp*. 2016; 37: 153–164. <https://doi.org/10.1002/hbm.23021> PMID: 26485059
  138. Ye AX, Leung RC, Schafer CB, Taylor MJ, Doesburg SM. Atypical resting synchrony in autism spectrum disorder. *Hum Brain Mapp*. 2014; 35: 6049–6066. <https://doi.org/10.1002/hbm.22604> PMID: 25116896
  139. Ghanbari Y, Bloy L, Shankar V, Edgar JC, Roberts TP, Schultz RT, et al. Functionally driven brain networks using multi-layer graph clustering. *Med Image Comput Comput Assist Interv*. 2014; 17: 113–120.
  140. Coskun MA, Loveland KA, Pearson DA, Papanicolaou AC, Sheth BR. Functional assays of local connectivity in the somatosensory cortex of individuals with autism. *Autism Res*. 2013; 6: 190–200. <https://doi.org/10.1002/aur.1276> PMID: 23427110
  141. Perez Velazquez JL, Barcelo F, Hung Y, Leshchenko Y, Nenadovic V, Belkas J, et al. Decreased brain coordinated activity in autism spectrum disorders during executive tasks: reduced long-range synchronization in the fronto-parietal networks. *Int J Psychophysiol*. 2009; 73: 341–349. <https://doi.org/10.1016/j.ijpsycho.2009.05.009> PMID: 19465065
  142. Uhlhaas PJ, Singer W. Abnormal neural oscillations and synchrony in schizophrenia. *Nat Rev Neurosci*. 2010; 11: 100–113. <https://doi.org/10.1038/nrn2774> PMID: 20087360
  143. von Stein A, Chiang C, Konig P. Top-down processing mediated by interareal synchronization. *Proc Natl Acad Sci U S A*. 2000; 97: 14748–14753. <https://doi.org/10.1073/pnas.97.26.14748> PMID: 11121074
  144. Buzsáki G, Wang X-J. Mechanisms of Gamma Oscillations. *Annu Rev Neurosci*. 2012; 35: 203–225. <https://doi.org/10.1146/annurev-neuro-062111-150444> PMID: 22443509
  145. Sporns O, Zwi JD. The small world of the cerebral cortex. *Neuroinformatics*. 2004; 2: 145–162. <https://doi.org/10.1385/NI:2:2:145> PMID: 15319512



146. Lindell AK, Hudry K. Atypicalities in cortical structure, handedness, and functional lateralization for language in autism spectrum disorders. *Neuropsychol Rev. United States*; 2013; 23: 257–270. <https://doi.org/10.1007/s11065-013-9234-5> PMID: 23649809
147. Golarai G, Grill-Spector K, Reiss AL. Autism and the development of face processing. *Clin Neurosci Res.* 2006; 6: 145–160. <https://doi.org/10.1016/j.cnr.2006.08.001> PMID: 18176635
148. Sasson NJ. The development of face processing in autism. *J Autism Dev Disord.* 2006; 36: 381–394. <https://doi.org/10.1007/s10803-006-0076-3> PMID: 16572261
149. Scott LS. Featural and configural face processing in adults and infants: a behavioral and electrophysiological investigation. *Perception.* 2006; 35: 1107–1128. <https://doi.org/10.1068/p5493> PMID: 17076069
150. Fiebelkorn IC, Foxe JJ, McCourt ME, Dumas KN, Molholm S. Atypical category processing and hemispheric asymmetries in high-functioning children with autism: revealed through high-density EEG mapping. *Cortex.* 2013; 49: 1259–1267. <https://doi.org/10.1016/j.cortex.2012.04.007> PMID: 22652240
151. Duerden EG, Arsalidou M, Lee M, Taylor MJ. Lateralization of affective processing in the insula. *Neuroimage.* 2013; 78: 159–175. <https://doi.org/10.1016/j.neuroimage.2013.04.014> PMID: 23587690
152. Clarke AR, Barry RJ, McCarthy R, Selikowitz M. EEG analysis in Attention-Deficit/Hyperactivity Disorder: a comparative study of two subtypes. *Psychiatry Res.* 1998; 81: 19–29. PMID: 9829647
153. Dykman RA, Holcomb PJ, Oglesby DM, Ackerman PT. Electro cortical frequencies in hyperactive, learning-disabled, mixed, and normal children. *Biol Psychiatry.* 1982; 17: 675–685. PMID: 7104419
154. Katada A, Ozaki H, Suzuki H, Suhara K. Developmental characteristics of normal and mentally retarded children's EEGs. *Electroencephalogr Clin Neurophysiol.* 1981; 52: 192–201. PMID: 6167428
155. Stroganova TA, Nygren G, Tsetlin MM, Posikera IN, Gillberg C, Elam M, et al. Abnormal EEG lateralization in boys with autism. *Clin Neurophysiol.* 2007; 118: 1842–1854. <https://doi.org/10.1016/j.clinph.2007.05.005> PMID: 17581774
156. Prabhakaran V, Smith JA, Desmond JE, Glover GH, Gabrieli JD. Neural substrates of fluid reasoning: an fMRI study of neocortical activation during performance of the Raven's Progressive Matrices Test. *Cogn Psychol.* 1997; 33: 43–63. <https://doi.org/10.1006/cogp.1997.0659> PMID: 9212721
157. Fein G, Raz J, Brown FF, Merrin EL. Common reference coherence data are confounded by power and phase effects. *Electroencephalogr Clin Neurophysiol.* 1988; 69: 581–584. Available: <http://www.ncbi.nlm.nih.gov/pubmed/2453336> PMID: 2453336
158. Cantor DS, Thatcher RW, Hrybyk M, Kaye H. Computerized EEG analyses of autistic children. *J Autism Dev Disord.* 1986; 16: 169–187. PMID: 3722118
159. Teipel SJ, Pogarell O, Meindl T, Dietrich O, Sydykova D, Hunklinger U, et al. Regional networks underlying interhemispheric connectivity: an EEG and DTI study in healthy ageing and amnesic mild cognitive impairment. *Hum Brain Mapp.* 2009; 30: 2098–2119. <https://doi.org/10.1002/hbm.20652> PMID: 18781594
160. Walker L, Gozzi M, Lenroot R, Thurm A, Behseta B, Swedo S, et al. Diffusion tensor imaging in young children with autism: biological effects and potential confounds. *Biol Psychiatry.* 2012; 72: 1043–1051. <https://doi.org/10.1016/j.biopsych.2012.08.001> PMID: 22906515
161. Mak-Fan KM, Morris D, Vidal J, Anagnostou E, Roberts W, Taylor MJ. White matter and development in children with an autism spectrum disorder. *Autism.* 2013; 17: 541–557. <https://doi.org/10.1177/1362361312442596> PMID: 22700988
162. Jochaut D, Lehongre K, Saitovitch A, Devauchelle AD, Olasagasti I, Chabane N, et al. Atypical coordination of cortical oscillations in response to speech in autism. *Front Hum Neurosci.* 2015; 9: 171. <https://doi.org/10.3389/fnhum.2015.00171> PMID: 25870556
163. Brock J. Alternative Bayesian accounts of autistic perception: comment on Pellicano and Burr. *Trends Cogn Sci.* 2012; 16: 573–575. <https://doi.org/10.1016/j.tics.2012.10.005> PMID: 23123383
164. Lawson RP, Rees G, Friston KJ. An aberrant precision account of autism. *Front Hum Neurosci.* 2014; 8: 302. <https://doi.org/10.3389/fnhum.2014.00302> PMID: 24860482
165. Pellicano E, Burr D. When the world becomes “too real”: a Bayesian explanation of autistic perception. *Trends Cogn Sci.* 2012; 16: 504–510. <https://doi.org/10.1016/j.tics.2012.08.009> PMID: 22959875
166. Van de Cruys S, Evers K, Van der Hallen R, Van Eylen L, Boets B, de-Wit L, et al. Precise minds in uncertain worlds: predictive coding in autism. *Psychol Rev.* 2014; 121: 649–675. <https://doi.org/10.1037/a0037665> PMID: 25347312
167. van Boxtel JJ, Lu H. Impaired global, and compensatory local, biological motion processing in people with high levels of autistic traits. *Front Psychol.* 2013; 4: 209. <https://doi.org/10.3389/fpsyg.2013.00209> PMID: 23630514

168. van Boxtel JJ, Lu H. A predictive coding perspective on autism spectrum disorders. *Front Psychol*. 2013; 4: 19. <https://doi.org/10.3389/fpsyg.2013.00019> PMID: 23372559
169. Gomez C, Lizier JT, Schaum M, Wollstadt P, Grutzner C, Uhlhaas P, et al. Reduced predictable information in brain signals in autism spectrum disorder. *Front Neuroinform*. 2014; 8: 9. <https://doi.org/10.3389/fninf.2014.00009> PMID: 24592235
170. Palmer CJ, Paton B, Kirkovski M, Enticott PG, Hohwy J. Context sensitivity in action decreases along the autism spectrum: a predictive processing perspective. *Proc Biol Sci*. 2015;282.
171. Palmer CJ, Paton B, Hohwy J, Enticott PG. Movement under uncertainty: the effects of the rubber-hand illusion vary along the nonclinical autism spectrum. *Neuropsychologia*. 2013; 51: 1942–1951. <https://doi.org/10.1016/j.neuropsychologia.2013.06.020> PMID: 23811293
172. Skewes JC, Jegindo EM, Gebauer L. Perceptual inference and autistic traits. *Autism*. 2015; 19: 301–307. <https://doi.org/10.1177/1362361313519872> PMID: 24523412
173. Brandeis D, Michel CM, Amzica F. From neuronal activity to scalp potential fields. In: Michel CM, Koenig T, Brandeis D, Gianotti LRR, Wackermann J, editors. *Electrical Neuroimaging*. 1st ed. Cambridge: Cambridge University Press; 2009. pp. 1–24.
174. David N, Schneider TR, Peiker I, Al-Jawahiri R, Engel AK, Milne E. Variability of cortical oscillation patterns: A possible endophenotype in autism spectrum disorders? *Neurosci Biobehav Rev*. 2016; 71: 590–600. <https://doi.org/10.1016/j.neubiorev.2016.09.031> PMID: 27746319
175. Butler JS, Molholm S, Andrade GN, Foxe JJ. An Examination of the Neural Unreliability Thesis of Autism. *Cereb Cortex*. United States; 2016;
176. Srinivasan R, Nunez PL, Silberstein RB. Spatial filtering and neocortical dynamics: estimates of EEG coherence. *IEEE Trans Biomed Eng*. 1998; 45: 814–826. <https://doi.org/10.1109/10.686789> PMID: 9644890
177. Shen MD, Nordahl CW, Young GS, Wootton-Gorges SL, Lee A, Liston SE, et al. Early brain enlargement and elevated extra-axial fluid in infants who develop autism spectrum disorder. *Brain*. 2013; 136: 2825–2835. <https://doi.org/10.1093/brain/awt166> PMID: 23838695
178. Vicente R, Gollo LL, Mirasso CR, Fischer I, Pipa G. Dynamical relaying can yield zero time lag neuronal synchrony despite long conduction delays. *Proc Natl Acad Sci*. 2008; 105: 17157–17162. <https://doi.org/10.1073/pnas.0809353105> PMID: 18957544
179. Wang XJ. Neurophysiological and computational principles of cortical rhythms in cognition. *Physiol Rev*. 2010; 90: 1195–1268. <https://doi.org/10.1152/physrev.00035.2008> PMID: 20664082
180. Engel AK, König P, Kreiter AK, Singer W. Interhemispheric Synchronization of Oscillatory Neuronal Responses in Cat Visual Cortex. *Science (80-)*. American Association for the Advancement of Science; 1991; 252: 1177–1179.
181. Rebollo B, Gonzalez Andino SL, Grave de Peralta Menendez R, Sanchez-Vives VM. Non-synaptic wave propagation: modulation of slow oscillations by endogenous electric fields. Program No. 591.08. 2016 Neuroscience Meeting Planner. San Diego, CA: Society for Neuroscience, 2016. Online
182. Schoffelen JM, Gross J. Source connectivity analysis with MEG and EEG. *Hum Brain Mapp*. 2009; 30: 1857–1865. <https://doi.org/10.1002/hbm.20745> PMID: 19235884
183. Vasa RA, Mostofsky SH, Ewen JB. The Disrupted Connectivity Hypothesis of Autism Spectrum Disorders: Time for the Next Phase in Research. *Biol Psychiatry Cogn Neurosci Neuroimaging*. 2016; 1: 245–252. <https://doi.org/10.1016/j.bpsc.2016.02.003> PMID: 28083565
184. Attal Y, Bhattacharjee M, Yelnik J, Cottureau B, Lefèvre J, Okada Y, et al. Modelling and detecting deep brain activity with MEG and EEG. *IRBM*. 2009; 30: 133–138.
185. Walsh P, Elsabbagh M, Bolton P, Singh I. In search of biomarkers for autism: scientific, social and ethical challenges. *Nat Rev Neurosci*. 2011; 12: 603–612. <https://doi.org/10.1038/nrn3113> PMID: 21931335
186. Kopell NJ, Gritton HJ, Whittington MA, Kramer MA. Beyond the connectome: the dynamome. *Neuron*. United States; 2014; 83: 1319–1328. <https://doi.org/10.1016/j.neuron.2014.08.016> PMID: 25233314
